# Supplementary material
Source: publisher site journal article supplement (https://www.spandidos-publications.com/2009/downloadSupplementary)
Supplement: Supplementary file 1 [file downloadSupplementary]

## Sheet: I-O
Table SIV: Differentially expressed peptides between the IgAN group and the other glomerular disease group
Peptide	m/z	Quality	Significance	Avg. ppm	Theoretical pI	Accession	PTM	IgAN-average	Others-average	IgAN/Others	P	Sample Profile (Ratio)	HPSN 102	HPSN 104	HPSN 110	HPSN 111	HPSN 2	HPSN 80	LN 123	LN 21	LN 218	LN 59	LN 60	LN 61	MCD 19	MCD 27	MCD 30	MCD 35	MCD 39	MCD 40	IgAN 1	IgAN 124	IgAN 13	IgAN 139	IgAN 15	IgAN 16	IgAN 171	IgAN 193	IgAN 194	IgAN 28	IgAN 32	IgAN 33	IgAN 358	IgAN 360	IgAN 4	IgAN 43	IgAN 85
PVPAL	496.32	0.04	60	3.7	5.96	sp|O95714|HERC2_HUMAN		0	845.556	0	0.0494896	0.72:0.76:0:0:0:0:0:1.40:0:1.00:0:0:0:0:0:0:0:0:0:0:0:0:0:0:0:0:0:0:0:0:0:0:0:0:0:0:0.55:0.79:0.47:0.84:0.57:0.68:0.90:0.47:0:0	2820	2970	0	0	0	0	0	5500	0	3930	0	0	0	0	0	0	0	0	0	0	0	0	0	0	0	0	0	0	0	0	0	0	0	0	0
RPPTPTLSLKPTPPAPVRLSPA	765.136	0.08	4.41	7.5	12.01			424.612	1563	0.271665	0.0492929	0:1.48:0.37:0:0:2.29:2.34:0.23:5.54:1.00:0.10:0.21:0:0.20:1.63:0.46:2.96:0:0:0:0.44:0:0:0.24:0:1.02:0.30:0:0.50:0.33:0.02:0:0:1.68:0.31:0:0:0:0:2.41:0:3.66:0.32:6.31:4.73:10.14	0	2210	555	0	0	3430	3500	341	8280	1490	156	316	0	297	2440	689	4430	0	0	0	657	0	0	354	0	1530	450	0	747	490	23.4	0	0	2510	457
AAQ(+.98)N(+.98)FFCAGCGTP	644.746	0.09	60	7.4	5.55		Deamidation (NQ)	2842.94	0	#DIV/0!	0.0491348	0:0:0:0:0:0:0:0:0:0:0:0:0:0:0:0:0:0:1.00:0:0:0.33:0:0:0.15:0:0:0:0:0:0.19:0:0.57:0:0:0:0:0:0:0:0:0:0:0:0:0	0	0	0	0	0	0	0	0	0	0	0	0	0	0	0	0	0	0	21600	0	0	7190	0	0	3130	0	0	0	0	0	4110	0	12300	0	0
LFPSLIKN(+.98)L	1045.63	0.21	4	5.9	8.75		Deamidation (NQ)	1753.35	4227.56	0.414744	0.0490248	0.09:1.32:3.95:0.73:3.09:4.59:0.82:0:0.20:1.00:0.57:1.69:1.07:0.39:0.08:0.59:0:1.14:0.97:0.60:0.53:0.23:0.30:0.33:0.71:0.87:0.07:0.16:0.59:0:0.51:0.17:1.04:1.15:0.11:0.89:1.50:0:2.76:0.29:0.30:3.06:0.68:0.26:0.94:0	310	4710	14100	2600	11000	16400	2920	0	725	3570	2050	6040	3810	1400	301	2100	0	4060	3470	2130	1890	823	1070	1190	2550	3100	249	568	2110	0	1820	599	3730	4120	388
FTSSTSYNRGDSTFESKSYKMA	624.284	0.21	60	4.9	8.43	sp|P02671|FIBA_HUMAN		6546.47	19655.6	0.33306	0.048815	1.00:1.86:1.14:0.20:0.05:0.12:0.14:0:1.05:0:0.29:0:2.80:0.65:0.28:0.33:2.26:4.25:0.85:0.42:0:1.07:0.19:0:0:0:0:0.31:0.12:0.45:0.23:0.78:0.21:0:0.53:0:0:0:0:0:0:0:0:0:0:0	21600	40000	24500	4300	1040	2680	3040	0	22600	0	6220	0	60400	14000	6080	7040	48600	91700	18400	9030	0	23100	4160	0	0	0	0	6650	2480	9780	4900	16900	4590	0	11300
GLPGPPDVPDHAA	621.82	0.06	5.82	6.4	4.2			4540	16018.9	0.283415	0.0487234	0:0:0:0:0.04:0:0:0.11:0.54:1.00:0.41:0.75:0:0.82:0.30:0:0.65:0.10:0.16:0:0.55:0:0:0:0:0.07:0:0:0:0:0:0.02:0:0.47:0:0.50:0:0.26:2.45:0:0:0:0:0:0:0	0	0	0	0	2730	0	0	6860	33100	60900	24900	45900	0	49800	18500	0	39300	6350	9450	0	33300	0	0	0	0	4040	0	0	0	0	0	1490	0	28900	0
SEKVKKAKAKSRIKMKKARKILAEKRAA	1066.02	0.16	60	7.2	11.29			10670	4072.38	2.62009	0.0487025	1.00:0:0.58:1.07:2.91:0.89:3.67:0.83:0:0:0:0:0.01:0:0:0.39:0:0:4.65:2.04:0:0.65:0:0:2.15:4.04:5.04:1.71:2.74:0:1.21:0:3.90:0:0:0:0:0:0:0:0:0:0:0:0:0	6450	0	3720	6930	18800	5750	23700	5330	0	0	0	0	92.9	0	0	2530	0	0	30000	13200	0	4170	0	0	13800	26100	32500	11000	17700	0	7820	0	25100	0	0
YSPSPLTAAPIGLGY	753.9	0.04	60	4.9	5.52			0	3227.78	0	0.048697	0:1.00:0:0:0:0:0:0:1.24:0:0:0:0:1.91:0:1.11:0:0:0:0:0:0:0:0:0:0:0:0:0:0:0:0:0:0:0:0:0:0:0:0:0:0:0:0:0:0	0	11100	0	0	0	0	0	0	13700	0	0	0	0	21100	0	12200	0	0	0	0	0	0	0	0	0	0	0	0	0	0	0	0	0	0	0
TNDTN(+.98)GYSSGGGGHSPSAD	594.564	0.16	60	4.1	4.2		Deamidation (NQ)	1211.76	3792.78	0.319493	0.0485744	1.00:1.38:0.43:0.31:0.27:0.68:0:0:0.52:0:0.36:0:0:0.32:0:0:0:0.19:0.46:0:0:0.20:0.21:0:0:0.17:0:0.15:0.11:0:0:0.34:0:0:0:0:0:0:0:0:0:0:0:0:0:0	12500	17300	5380	3870	3340	8490	0	0	6530	0	4500	0	0	3950	0	0	0	2410	5810	0	0	2540	2590	0	0	2190	0	1860	1360	0	0	4250	0	0	0
RRLRN(+.98)LGQPV	1209.72	0.04	60	10.7	12.3		Deamidation (NQ)	350.647	84.5778	4.14585	0.0484849	0:0:0:0:0:0:1.00:0:0:0:0:0:0:0:15.48:0:0:0:0:4.33:17.07:2.78:10.08:0:7.13:0.81:2.39:4.96:0:5.29:2.32:0:0:0:7.31:0:0:0:0:0:0:0:0:0:0:0	0	0	0	0	0	0	92.4	0	0	0	0	0	0	0	1430	0	0	0	0	400	1580	257	932	0	659	75	221	458	0	489	215	0	0	0	675
AIVGIGGGGGLLLLVIVAVLIAYKRKSR	702.429	0.02	5.22	6.6	11.1			70	1103.33	0.0634441	0.0482521	0:0:0:1.00:0:0:0:0:1.76:0:0:0:0.35:0.92:1.33:0:0:0:0:0:0:0:0.32:0:0:0:0:0:0:0:0:0:0:0:0:2.12:0:0.45:1.29:0:0.32:0.28:0:0:0.16:0.57	0	0	0	3710	0	0	0	0	6510	0	0	0	1300	3400	4940	0	0	0	0	0	0	0	1190	0	0	0	0	0	0	0	0	0	0	0	0
F(+42.01)PVARYALR	1134.68	0.06	4	7	10.84		Acetylation (Protein N-term)	875.2	148.056	5.91129	0.0481924	0:0:0:0:0.47:1.36:0:0:0:1.00:0:0:0:0:0.51:0:0.41:0:0.13:0:0:0.39:1.07:0.22:0:1.30:1.94:1.64:8.38:3.58:0:0:0.39:0.47:1.43:2.25:0.46:0:0:0:0:0:0:0.33:0:0	0	0	0	0	334	968	0	0	0	711	0	0	0	0	363	0	289	0	94.4	0	0	276	761	156	0	927	1380	1160	5950	2540	0	0	280	334	1020
Q(-17.03)SVLQRRRKLRRRKTISGIPR	863.201	0.13	2.89	5.9	12.78		Pyro-glu from Q	558.588	1398	0.399562	0.0479281	0:1.84:0.60:1.48:0.28:0.25:2.56:0:1.12:1.00:1.73:0.97:3.38:0.40:0:5.65:2.92:1.03:0:0:0:1.06:1.68:0:0:2.91:0:0:1.64:1.18:0:0.60:0:0.45:0:0.85:0:0.17:4.27:0:2.71:1.40:0:0:1.29:1.59	0	1830	599	1480	278	247	2560	0	1120	998	1730	967	3380	395	0	5640	2910	1030	0	0	0	1060	1670	0	0	2900	0	0	1640	1180	0	601	0	445	0
EEHGIDLAGSDRGASALQLE	690	0.12	60	4.8	4.17			3366.47	1339.44	2.51333	0.0478461	0:0:0:0:0:0:1.00:2.00:0:0:0:0:1.31:0:1.37:1.96:0:0:1.22:0.96:0:0:0:0:0:1.51:0:1.53:1.82:2.97:1.76:1.77:1.21:0:3.40:0:0:0:0:0:0:0:0:0:0:0	0	0	0	0	0	0	3150	6320	0	0	0	0	4130	0	4330	6180	0	0	3860	3020	0	0	0	0	0	4770	0	4830	5740	9370	5550	5570	3820	0	10700
EGN(+.98)ANSPA	760.285	0.04	60	7.9	4		Deamidation (NQ)	0	498.333	0	0.0478038	1.00:0.65:1.30:0:0:0:0:0:0.84:0:0:0:0:0:0:0:0:0:0:0:0:0:0:0:0:0:0:0:0:0:0:0:0:0:0:0:0:0:0:0:0:0:0:0:0:0	2370	1530	3090	0	0	0	0	0	1980	0	0	0	0	0	0	0	0	0	0	0	0	0	0	0	0	0	0	0	0	0	0	0	0	0	0
KRGTGAGGDSGPEEDYLSLGAEACN(+.98)FM(+15.99)QSSSAKQKTPPPVAP	1064	0.02	60	8.6	4.94		Deamidation (NQ); Oxidation (M)	0	489.444	0	0.0476701	0:0:1.00:0.75:0:0:0:0:0.96:0:0:0:0:0:0:0:0:1.47:0:0:0:0:0:0:0:0:0:0:0:0:0:0:0:0:0:0:0:0:0:0:0:0:0:0:0:0	0	0	2110	1570	0	0	0	0	2030	0	0	0	0	0	0	0	0	3100	0	0	0	0	0	0	0	0	0	0	0	0	0	0	0	0	0
TCVEGTIPK	474.251	0.01	60	9.1	5.66			2202.94	175.111	12.5802	0.0476011	0:0:0:0:1.00:0:0:0:0:0:0:0:2.08:0:4.21:0:0:0:0:0:0:0:33.67:6.50:0:6.72:0:0:0:17.35:0:0:19.61:0:2.68:0:0:0:0:0:0:0:0:0:0:0	0	0	0	0	432	0	0	0	0	0	0	0	900	0	1820	0	0	0	0	0	0	0	14600	2810	0	2900	0	0	0	7500	0	0	8480	0	1160
LRGPHLAKLELIRRLRSQ(+.98)	719.781	0.06	5.39	6.3	12		Deamidation (NQ)	200	1081.61	0.184909	0.0471836	1.00:0:0:0:0:1.47:1.05:0:0.18:0:0.67:0.05:0:1.20:0:0.15:0:1.85:0:0:0:0:0:0:0:0:0:0:0:0:1.33:0:0:0:0:0.67:2.11:1.49:0.35:0.41:0.79:0.52:0.97:0.68:2.40:2.61	2560	0	0	0	0	3760	2680	0	455	0	1700	129	0	3070	0	385	0	4730	0	0	0	0	0	0	0	0	0	0	0	0	3400	0	0	0	0
NRVGKVEHGSVALPAIM	593.332	0.01	60	9	8.75			457.529	0	#DIV/0!	0.0471398	0:0:0:0:0:0:0:0:0:0:0:0:0:0:0:0:0:0:0:0:0:0:1.00:0:0:0:0:0:0:0:0.76:1.13:0:4.24:2.32:0:0:0:0:0:0:0:0:0:0:0	0	0	0	0	0	0	0	0	0	0	0	0	0	0	0	0	0	0	0	0	0	0	822	0	0	0	0	0	0	0	625	931	0	3490	1910
HPGSSFLKKTSKKL	779.467	0.1	3.69	9.9	10.48			963.529	3509.44	0.274553	0.046942	0:0:0.02:0:0.04:0.62:0:0.15:0:1.00:0.63:0:0:0.18:1.31:0.91:0.76:0.03:0.40:0:0.11:0:0.32:0:0:0:0.38:0:0.16:0.10:0:0:0:0:0:0.35:0.08:0.21:0.45:0.31:0.50:0.05:0.19:0.20:0.16:0.06	0	0	241	0	452	6970	0	1650	0	11200	7020	0	0	1970	14600	10200	8510	357	4460	0	1250	0	3560	0	0	0	4250	0	1750	1110	0	0	0	0	0
VKVFSLAVNLIAID	751.452	0.04	5.43	8.8	5.81	sp|P01024|CO3_HUMAN		225.118	2200.56	0.1023	0.0465398	3.43:0:1.79:0:0:0:0:0.43:0.44:1.00:0.42:1.40:0.25:0:0:0:0:0:0:0:0.38:0:0:0.34:0:0:0:0.17:0:0:0:0:0:0:0:0.56:0:0.15:5.71:0.32:0.48:3.11:0:0:0.11:0.13	14800	0	7740	0	0	0	0	1850	1900	4330	1840	6050	1100	0	0	0	0	0	0	0	1630	0	0	1460	0	0	0	737	0	0	0	0	0	0	0
QGIQGQ(+.98)TETENTETVDSGM(+15.99)SNGM(+15.99)VCA	907.369	0.05	60	7	3.5		Deamidation (NQ); Oxidation (M)	3910	690	5.66667	0.0464007	0:0:1.00:0:0.48:0:0:0:0:0:0:0:1.35:0:0:0.82:0:0:4.73:0:4.84:2.63:0:0:0:2.24:0.42:0:0:0:0:4.68:0:0:0:0:0:0:0:0:0:0:0:0:0:0	0	0	3400	0	1640	0	0	0	0	0	0	0	4590	0	0	2790	0	0	16100	0	16500	8920	0	0	0	7610	1440	0	0	0	0	15900	0	0	0
RTGPALVLGRVRPPGALLSVPVLSSLLLQ(+.98)M(+15.99)	1043.3	0.01	60	8.1	12.3		Deamidation (NQ); Oxidation (M)	335.588	1788.78	0.187608	0.046236	0:1.00:0:2.59:29.24:54.71:7.54:0:0:0:0:36.53:0:27.80:12.95:0:46.02:0:0:0:0:0:4.75:30.61:2.09:0:0:0:0:0:0:0:0:1.27:0:0:0:0:0:0:0:0:0:0:0:0	0	147	0	381	4310	8070	1110	0	0	0	0	5390	0	4100	1910	0	6780	0	0	0	0	0	700	4510	308	0	0	0	0	0	0	0	0	187	0
E(-18.01)LNALMLRGLRRLRELRLPGNRL	914.56	0.07	2.06	7.7	12		Pyro-glu from E	971.765	2622.78	0.37051	0.046019	1.00:0.49:0.36:0.39:0:0.67:0.49:0.91:0:0:0:0.65:0:0.94:0.55:0.42:0:1.46:0.34:0:0:1.40:0:0:0:0.19:0:0.99:0:0:0:0:0:0:0:1.55:0.17:0.25:0.34:0.34:0:1.06:0:0.53:0:0	5660	2790	2060	2210	0	3810	2760	5170	0	0	0	3680	0	5340	3100	2350	0	8280	1920	0	0	7930	0	0	0	1050	0	5620	0	0	0	0	0	0	0
LKKFQVT	863.535	0.01	60	5.2	10			0	97	0	0.0457877	0:0:0.67:0:0:0:0:0:0:1.00:0:0:0.74:0:0:0:1.15:0:0:0:0:0:0:0:0:0:0:0:0:0:0:0:0:0:0:0.91:0:0:0.69:1.45:1.02:0.80:0:0.48:-:0.15	0	0	327	0	0	0	0	0	0	491	0	0	362	0	0	0	566	0	0	0	0	0	0	0	0	0	0	0	0	0	0	0	0	0	0
KSAGLVKATGR	1087.66	0.13	5.98	6	11.17			1827.76	895.389	2.04131	0.0455348	4.91:0:0:6.48:0:1.28:0.77:0:0:1.00:0:0.42:1.12:6.49:0.40:5.54:4.96:10.58:0.54:5.96:9.35:7.77:4.87:8.00:3.75:7.42:3.86:0.33:16.00:2.64:2.82:0.38:0.79:5.88:4.26:1.72:0:0:2.05:5.02:0:0:1.79:4.49:0:0	1800	0	0	2380	0	469	281	0	0	367	0	154	410	2380	146	2030	1820	3880	198	2190	3430	2850	1790	2940	1380	2720	1420	122	5870	970	1040	141	291	2160	1560
Q(-17.03)ILSLTAKKERLQILNVQ(+.98)LSVPFPALPAALPAANGPV	966.335	0.04	60	10.8	9.99		Pyro-glu from Q; Deamidation (NQ)	1614.71	530.778	3.04215	0.044942	0:0:0:0:0:0:1.00:0.71:0:0:0:0:0.60:3.55:0:0.83:0:0:0:1.67:1.42:1.71:3.87:2.25:2.84:0:0:0:0:0:0:0.95:0:2.73:1.82:0:0:0:0:2.49:0:0:1.07:0:0.59:0	0	0	0	0	0	0	1430	1010	0	0	0	0	854	5070	0	1190	0	0	0	2390	2020	2430	5520	3200	4050	0	0	0	0	0	0	1360	0	3890	2590
HLEVYAAVKGLRKGDAEVAITRLVDALKLQ(+.98)	820.246	0.1	2.44	7.1	8.44		Deamidation (NQ)	1004.12	2736.83	0.36689	0.044494	0:0.38:0.57:1.21:0.30:2.18:0.23:0.16:0:1.00:1.57:0:0.62:1.76:0.18:0:0.82:0.07:0.23:0:0:0.81:0.60:1.26:0:0:0:0:0:0.39:0:0:0:0.53:0:0:0.41:0:0.39:0:1.24:0:0.76:0.72:0.21:0.98	0	1710	2550	5400	1320	9720	1020	702	0	4460	6990	0	2780	7860	782	0	3670	299	1020	0	0	3620	2660	5630	0	0	0	0	0	1760	0	0	0	2380	0
TVPVALPIQQ	533.321	0.03	60	8.3	5.19			1210.29	258.333	4.68501	0.0441598	0:1.00:0:0:0:0:0:0:0:0:0:0:0:0.23:0.98:0:0:0:0:0:2.33:0.19:0.56:2.15:0:2.32:0.33:0.67:0:0:0.27:0.94:0:0:0:0:0:0:0:0:0:0:0:0:0:0	0	2110	0	0	0	0	0	0	0	0	0	0	0	490	2050	0	0	0	0	0	4910	397	1180	4540	0	4890	699	1420	0	0	559	1980	0	0	0
ADGDCEDDEDDDGVDEDAEEEGDGEEAG	967.981	0.01	60	6	2.87			82.3529	988.889	0.0832783	0.0441287	1.00:0.92:0:0:0:0:0:0.45:0:0:0.75:0:0.45:0:0:0:0:0:0:0:0:0:0:0:0:0:0:0:0:0.28:0:0:0:0:0:0:0:0:0:0:0:0:0:0:0:0	4980	4580	0	0	0	0	0	2250	0	0	3740	0	2250	0	0	0	0	0	0	0	0	0	0	0	0	0	0	0	0	1400	0	0	0	0	0
QNGAGEDN(+.98)QQENKPS	808.829	0.17	60	5.2	4.14		Deamidation (NQ)	3333.12	7458.72	0.446875	0.0437099	1.00:0:3.73:7.97:2.00:3.93:0:3.57:9.02:0:10.53:4.23:1.68:0:0.35:2.08:3.72:4.54:3.69:1.70:0:0.50:0:0:1.65:0:0:1.77:0.28:1.97:2.29:5.07:0.58:3.64:1.48:0:0:0:0:0:0:0:0:0:0:0	2300	0	8580	18300	4610	9050	0	8220	20800	0	24200	9740	3880	0	807	4800	8570	10400	8480	3910	0	1160	0	0	3800	0	0	4070	633	4530	5260	11700	1330	8380	3410
PLSIVEK	393.244	0.01	60	9.1	6.43			0	373.333	0	0.0430024	0:0:1.00:0:0.81:0:0:1.23:0:0:0:0:0:0:0:0:0:1.21:0:0:0:0:0:0:0:0:0:0:0:0:0:0:0:0:0:0:0:0:0:0:0:0:0:0:0:0	0	0	1580	0	1280	0	0	1950	0	0	0	0	0	0	0	0	0	1910	0	0	0	0	0	0	0	0	0	0	0	0	0	0	0	0	0
YSKQFTSSTSYNRGDSTFESKSYKMADEAGSEADHEGTHST	905.591	0.02	60	13.6	5.01	sp|P02671|FIBA_HUMAN		1779.41	0	#DIV/0!	0.0427812	0:0:0:0:0:0:0:0:0:0:0:0:0:0:0:0:0:0:0:0:1.00:0:0:2.40:0:2.03:1.09:0:0:0:0:0:0:0:0:0:0:0:0:0:0:0:0:0:0:0	0	0	0	0	0	0	0	0	0	0	0	0	0	0	0	0	0	0	0	0	4640	0	0	11100	0	9440	5070	0	0	0	0	0	0	0	0
PGRLAEVCAVLLRL	755.459	0.05	3.48	8.8	8.68			2273.18	396.111	5.73873	0.0426592	1.02:0:0:0:0:0:0:0:0:1.00:0:0:0.83:0:0:0:0:0.47:3.15:0.58:0.34:1.40:6.74:0.15:2.08:0:1.60:0:0.75:1.26:0:0:0:0:0:1.03:0.96:0:7.43:0:0.36:0.18:0:0.17:0:0	2190	0	0	0	0	0	0	0	0	2150	0	0	1780	0	0	0	0	1010	6750	1240	732	3000	14400	312	4470	0	3420	0	1610	2710	0	0	0	0	0
AEEVHSDPCENNPCLHGGTCNANGT	643	0.08	60	7.7	4.39			994.706	192.222	5.17477	0.0424693	1.00:0:0:0:0:0:0:1.33:0:0:0:0:0:0:0:0:0:0:0:0.76:0:0:0:0:0:2.10:2.91:1.99:1.99:0:1.63:0:0:0:0:0:0:0:0:0:0:0:0:0:0:0	1490	0	0	0	0	0	0	1970	0	0	0	0	0	0	0	0	0	0	0	1120	0	0	0	0	0	3130	4320	2960	2960	0	2420	0	0	0	0
Q(-17.03)ERYEIEETETVT	805.36	0.03	60	5	3.98		Pyro-glu from Q	934.118	128.111	7.29146	0.0424287	0:0:0:0:0:0:1.00:0:0:0:0:0:1.52:0:0:0:0:0:0:0:0:0:0:0:0:4.04:2.62:3.04:2.54:5.10:0:0:0:0:0:0:0:0:0:0:0:0:0:0:0:0	0	0	0	0	0	0	916	0	0	0	0	0	1390	0	0	0	0	0	0	0	0	0	0	0	0	3700	2400	2780	2330	4670	0	0	0	0	0
LVEGEIAEEAAEKAT	780.391	0.16	60	6.2	3.98			19588.2	9775.56	2.0038	0.0423762	1.00:0.75:0:0.39:0.79:0:0.34:0:0.30:0:1.02:0:0.88:1.90:3.49:0.79:2.49:0.86:0:0.31:2.02:0:2.36:2.87:0:1.53:2.33:1.24:1.57:3.23:1.34:1.36:0.42:2.72:5.13:0:0:0:0:0:0:0:0:0:0:0	11700	8790	0	4590	9300	0	4040	0	3510	0	12000	0	10300	22200	41000	9230	29200	10100	0	3690	23600	0	27700	33600	0	17900	27300	14600	18300	37800	15800	15900	4910	31800	60100
ENRGGDPHSEAPFAKSDN(+.98)QPSTEKAME	977.436	0.64	60	6.1	4.64	sp|Q8WXH0|SYNE2_HUMAN	Deamidation (NQ)	139050	319339	0.435431	0.0423472	1.00:3.45:1.74:1.20:0.09:0.85:0.36:0.25:3.05:0:1.25:0.32:4.03:0.41:0.20:1.42:1.47:2.02:1.41:0.24:0.02:2.48:0:0:2.01:0:0:0.12:0.09:1.23:0.11:0.24:1.02:0.20:0.33:0:0:0:0:0:0:0:0:0:0:0	249000	858000	433000	298000	22000	211000	90600	62300	759000	0	312000	79400	1000000	101000	49800	354000	365000	504000	351000	59600	4350	618000	0	0	499000	0	0	30100	23000	305000	27700	59300	254000	50000	82800
GIAGPPGARGPPGAVGSPGV	835.957	0.12	3.55	5.8	9.75			3225.88	9055.56	0.356232	0.0418208	0.98:0:0.41:1.07:0.42:0:0:0.32:0:1.00:0.08:0.92:0.10:0:1.38:0:0.55:0:0:0:0.43:0:0:0:0.35:0:0:0.60:0.09:0.35:0.29:0.21:0.12:0:0:0:2.09:1.60:0.66:0:0.10:1.82:1.21:0.40:0.45:0	22000	0	9190	24200	9530	0	0	7230	0	22500	1800	20800	2350	0	31100	0	12300	0	0	0	9690	0	0	0	7920	0	0	13500	2010	7840	6530	4670	2680	0	0
DSTFESKSY	532.232	0.09	60	1.5	4.37	sp|P02671|FIBA_HUMAN		1922.88	4456.5	0.431478	0.0417581	0:1.01:2.65:3.27:0.86:1.26:2.05:0:1.09:1.00:0:2.03:0:2.23:0:0.24:0:1.83:0:1.95:0:1.50:0:0:0.96:0.88:0.61:0.71:0.23:0:0.32:0.80:0:0:0:0:0:0:0:0:0:0:0:0:0:0	0	4150	10900	13400	3550	5170	8430	0	4470	4110	0	8340	0	9170	0	997	0	7530	0	8010	0	6140	0	0	3960	3610	2520	2920	939	0	1300	3290	0	0	0
LGATLFAALGLRSTLLTVLGA	1029.61	0.02	60	6.4	9.75			510.588	75	6.80784	0.0416843	0:0:0:1.00:0:0:0:0:0:0:0:0:0:0:0:0:0:0:0:0.26:0.34:2.18:0.42:0.13:-:0:1.28:0.18:0:0.65:0:0:1.01:0:0:5.92:0:0:0.05:1.09:0:0:0:0.81:0:0	0	0	0	1350	0	0	0	0	0	0	0	0	0	0	0	0	0	0	0	355	456	2930	570	177	0	0	1720	241	0	871	0	0	1360	0	0
PPTPPPLLLLLFPLLLFSRLCGAL	867.867	0.01	60	5.5	8.68			0	1258.22	0	0.0409822	1.00:0:0:0:0:0.13:0:0.96:0:0:0:0.75:0:0:0:0.14:0:0.21:0:0:0:0:0:0:0:0:0:0:0:0:0:0:0:0:0:0.79:0:0:0.10:0:0.34:0:0.43:0.39:0:0.61	7100	0	0	0	0	912	0	6810	0	0	0	5350	0	0	0	966	0	1510	0	0	0	0	0	0	0	0	0	0	0	0	0	0	0	0	0
N(+.98)TATTATSNMAGQ(+.98)HGCSN(+.98)PPCETH	608.979	0.02	60	1.9	5.98		Deamidation (NQ)	0	399.278	0	0.0408898	1.00:0:0.42:0.80:0:0:0:0:0:0:0:0:0:0:0:0.20:0:0.42:0:0:0:0:0:0:0:0:0:0:0:0:0:0:0:0:0:0:0:0:0:0:0:0:0:0:0:0	2530	0	1070	2030	0	0	0	0	0	0	0	0	0	0	0	507	0	1050	0	0	0	0	0	0	0	0	0	0	0	0	0	0	0	0	0
Q(-17.03)EILESEEKGDPNKPSGF	993.963	0.09	60	3.9	4.25	sp|O00151|PDLI1_HUMAN	Pyro-glu from Q	4086.47	1068.89	3.8231	0.0408896	0:0:0:0:1.00:0:0:0:0:0:0:0:0:1.36:1.52:0:1.77:0:0:0:3.70:0:1.95:4.94:0:4.01:2.04:0:0:0:0.45:0:0:1.92:1.38:0:0:0:0:0:0:0:0:0:0:0	0	0	0	0	3400	0	0	0	0	0	0	0	0	4640	5190	0	6010	0	0	0	12600	0	6650	16800	0	13700	6960	0	0	0	1530	0	0	6530	4700
GSNGSPG	575.247	0.49	60	2.6	5.52	sp|Q96P44|COLA1_HUMAN		18788.8	47557.2	0.395078	0.0407857	1.00:3.40:2.51:2.88:0:1.74:0.39:1.33:5.65:0:0.18:4.22:0:6.64:0.99:0.88:0.57:0.83:0:0.14:0:0.21:0:0:0.49:2.03:1.94:0.41:0.76:0.30:0.93:1.66:0:2.75:0.77:0:0:0:0:0:0:0:0:0:0:0	25800	87500	64600	74100	0	44900	9960	34300	146000	0	4570	109000	0	171000	25500	22800	14600	21400	0	3690	0	5470	0	0	12600	52200	49900	10600	19500	7850	24100	42800	0	70900	19800
KELM(+15.99)IVGRVFVLLLVLVSILWIPVVQ(+.98)ASQ	1093.99	0.16	60	8.1	8.75		Oxidation (M); Deamidation (NQ)	1290	3806.11	0.338929	0.0407066	1.00:0.44:1.01:1.60:0.42:0.86:0:0:1.53:0:0:0:0.53:0:0.61:0.49:0:0:0.36:0.68:0:0:0:0:0:0.90:0:0:0:0.34:0:0.44:0:0:0:0:0:0:0:0:0:0:0:0:0:0	8060	3560	8160	12900	3420	6920	0	0	12300	0	0	0	4290	0	4950	3950	0	0	2870	5510	0	0	0	0	0	7280	0	0	0	2730	0	3540	0	0	0
EETGDHSMDDSSEDGKM(+15.99)ETKSDH	646.497	0.02	60	6.7	4.16		Oxidation (M)	652.765	0	#DIV/0!	0.0404303	0:0:0:0:0:0:0:0:0:0:0:0:0:0:0:0:0:0:1.00:0:0:0:0:0:0.20:0:0.68:0:0.20:0:0:0:1.21:0:0:0:0:0:0:0:0:0:0:0:0:0	0	0	0	0	0	0	0	0	0	0	0	0	0	0	0	0	0	0	3380	0	0	0	0	0	665	0	2280	0	682	0	0	0	4090	0	0
SAPTDVLDSLTTIPEL	836.432	0.07	60	8.6	3.49			334.647	38.5556	8.67961	0.040013	0:0:0:0:0:0:1.00:0:0:0:0:0:0:0:0:0:0:0:0:0:0:0:0:0:0:0:0:0:1.32:2.22:0:1.51:2.11:0:1.03:0:0:0:0:0:0:0:0:0:0:0	0	0	0	0	0	0	694	0	0	0	0	0	0	0	0	0	0	0	0	0	0	0	0	0	0	0	0	0	916	1540	0	1050	1470	0	713
HGYSCDCSN(+.98)TAYDGT	532.185	0.11	60	3	4.2		Deamidation (NQ)	5001.76	20627.8	0.242477	0.0400122	0:0:1.00:0:0:0:2.30:0:0:0:0.57:0.46:1.08:0.71:0:1.50:0.70:0.60:0:0:1.25:0:0:0.18:0:0:0:0:0:0:0:0:0:0:0.62:0:0:0:0:0:0:0:0:0:0:0	0	0	41600	0	0	0	95700	0	0	0	23600	19200	44900	29700	0	62500	29200	24900	0	0	51800	0	0	7430	0	0	0	0	0	0	0	0	0	0	25800
TPAGK	473.271	0.11	60	3	8.41			867.647	3423.33	0.253451	0.0398771	0:0:1.00:0.81:0:1.01:1.27:0:0.89:0:0:0.76:0:0:0:0.74:0:0:0.13:0.21:0:0:0:0:0.48:0.72:0:0:0:0:0:0:0:0:0:0:0:0:0:0:0:0:0:0:0:0	0	0	9520	7690	0	9570	12100	0	8490	0	0	7220	0	0	0	7030	0	0	1270	2020	0	0	0	0	4580	6880	0	0	0	0	0	0	0	0	0
RRVSI	630.397	0.02	60	10.1	12			944.118	0	#DIV/0!	0.0398611	0:0:0:0:0:0:0:0:0:0:0:0:0:0:0:0:0:0:0:1.00:0:1.28:0.99:0:0:0:0:0:0:0:0:0:0.44:0:0:0:0:0:0:0:0:0:0:0:0:0	0	0	0	0	0	0	0	0	0	0	0	0	0	0	0	0	0	0	0	4330	0	5540	4270	0	0	0	0	0	0	0	0	0	1910	0	0
LSKHIKT	826.524	0.01	60	8	10			0	187.889	0	0.0398007	0:0:0:0:0:0:0.76:0:0:1.00:3.90:1.35:2.39:0:0:0:0.52:0:0:0:0:0:0:0:0:0:0:0:0:0:0:0:0:0:0:0:1.22:0:0:1.06:0:0:0:0:0.23:2.28	0	0	0	0	0	0	258	0	0	341	1330	461	814	0	0	0	178	0	0	0	0	0	0	0	0	0	0	0	0	0	0	0	0	0	0
FTFDNVLPGK	569.303	0.05	60	6.8	5.84			1681.76	618.889	2.71739	0.0393739	0:0:0:0:1.00:0:0:0:0:0:0:0:0:2.17:0:1.57:0.84:0:0:0:1.16:0:1.89:1.18:0:0:2.06:0.78:1.41:1.32:0.79:0:0:2.19:1.54:0:0:0:0:0:0:0:0:0:0:0	0	0	0	0	2000	0	0	0	0	0	0	0	0	4320	0	3140	1680	0	0	0	2310	0	3770	2360	0	0	4110	1550	2810	2640	1580	0	0	4380	3080
LAETLKREKLKVAN(+.98)KIESIPVKGIIPSKKTKQKEV	987.099	0.01	5.26	9.4	10.1		Deamidation (NQ)	67.6471	940	0.071965	0.0390133	0:1.00:0.28:0:0:0:0:0.22:0:0:0:0:0:0:0.76:0:0.32:0.92:0:0:0:0:0:0.24:0:0:0:0:0:0:0:0:0:0:0:0:0.37:0:0.38:0:0:1.12:0:0.27:0:0	0	4840	1340	0	0	0	0	1050	0	0	0	0	0	0	3670	0	1550	4470	0	0	0	0	0	1150	0	0	0	0	0	0	0	0	0	0	0
RTPQGIGLLAKTPLSRPVK	1016.63	0.09	6.31	8.1	12.02			262.059	2073	0.126415	0.0389718	2.33:2.92:14.93:5.27:21.75:0.53:0:0:2.53:1.00:0:1.82:4.41:1.95:3.03:0:0:0:0:0:0:0:1.23:0:2.54:0:0:0.67:0.87:0:1.58:0.56:0:0:0:0.59:3.85:0:0:1.53:2.16:0.88:7.32:11.64:3.60:0	1390	1740	8920	3150	13000	317	0	0	1510	597	0	1090	2630	1160	1810	0	0	0	0	0	0	0	737	0	1520	0	0	400	520	0	941	337	0	0	0
PTNVKVVLPAA	554.837	0.04	60	2.5	9.18			344.118	0	#DIV/0!	0.0389612	0:0:0:0:0:0:0:0:0:0:0:0:0:0:0:0:0:0:0:0:0:0:0:0:0:0:0:0:1.00:1.34:0.62:0:0.68:0:0:0:0:0:0:0:0:0:0:0:0:0	0	0	0	0	0	0	0	0	0	0	0	0	0	0	0	0	0	0	0	0	0	0	0	0	0	0	0	0	1610	2150	1000	0	1090	0	0
Q(-17.03)QCPN(+.98)MCSGHGSCD	725.74	0.32	60	4.6	5.08		Pyro-glu from Q; Deamidation (NQ)	48301.5	99772.2	0.484117	0.0384178	1.00:0.40:0.06:0.43:0.23:0.08:0.36:0.25:0.18:0:0.08:0.32:0.76:0.17:0.64:0.38:1.21:0.58:0.04:0.12:0.03:0.30:0.03:0.00:0.28:0.02:0.05:0.46:0.25:0.12:0.80:0.36:0:0.15:0.23:0:0:0:0:0:0:0:0:0:0:0	252000	101000	15000	108000	57300	20200	91400	62200	45600	0	20500	79800	192000	44000	160000	94900	306000	146000	10700	30800	8480	74900	8370	305	69900	5170	13700	117000	63400	30200	202000	91800	0	36600	57800
E(-18.01)KRVLGLVLLRGENLVSMTVE	779.782	0.01	60	12.8	6.33		Pyro-glu from E	822.588	85.5556	9.61467	0.0382961	0:0:0:0:0:0:0:0:0:1.00:0:0:0:0:0:0:0:0:3.17:1.55:0:0:0:1.17:0.36:1.68:0:1.14:0:0:0:0:0:0:0:0:0:2.74:0.57:0:0:0.32:0:0:-:0	0	0	0	0	0	0	0	0	0	1540	0	0	0	0	0	0	0	0	4880	2390	0	0	0	1810	554	2590	0	1760	0	0	0	0	0	0	0
KVPPQKPRR	553.35	0.07	3.32	7.5	12.02			693.882	178.333	3.89093	0.0382887	0:0:0:0:1.00:0.13:0:0.18:0:0:0.59:0:0:0.53:0:0:0:0:0:0:0:0:0:1.58:0.96:1.37:0:1.43:0:1.79:0.35:0:1.46:0:0:0.36:0.47:0.48:0.72:0.82:0.48:0:0.42:0.60:0.20:0	0	0	0	0	1320	174	0	237	0	0	782	0	0	697	0	0	0	0	0	0	0	0	0	2090	1270	1800	0	1890	0	2360	456	0	1930	0	0
GNALVVDPKK	1040.61	0.06	5.58	7.9	8.59			195.9	53.5611	3.6575	0.0382635	0.36:0:0:0:0:0:0.12:0:0:1.00:0:0:0:0:0:1.41:0:0:0:0.92:0:2.34:0.59:0:0.19:0:0.11:0:0.65:1.87:0:0:1.37:0.84:1.08:1.10:3.59:0:3.10:3.07:5.08:0:1.43:0.50:0:0	121	0	0	0	0	0	39.1	0	0	334	0	0	0	0	0	470	0	0	0	308	0	783	197	0	62.1	0	37.2	0	218	626	0	0	459	280	360
LKARKSATV	487.31	0.05	60	8.1	11.17			1075.88	322.222	3.33895	0.0380714	0:0:0:0:1.00:2.17:0:0:0:0:0:0:0:0:2.93:0:0:0:2.09:3.06:2.92:0:3.05:2.27:0:0:0:1.96:2.32:0:0:0:1.59:0:0:0:0:0:0:0:0:0:0:0:0:0	0	0	0	0	950	2060	0	0	0	0	0	0	0	0	2790	0	0	0	1980	2910	2770	0	2900	2160	0	0	0	1860	2200	0	0	0	1510	0	0
M(+15.99)DECQDGM(+15.99)F	554.168	0.1	60	9.5	3.49		Oxidation (M)	256.353	1417.33	0.18087	0.0379839	1.00:4.39:0:0.12:0:0:0:2.59:0.81:0:4.19:0:0:0.86:0:0.41:1.42:1.05:0.34:0:0:0:0:0:0:0:0:0:0:0.50:0:0.37:0:1.66:0:0:0:0:0:0:0:0:0:0:0:0	1510	6660	0	186	0	0	0	3920	1230	0	6340	0	0	1300	0	626	2150	1590	516	0	0	0	0	0	0	0	0	0	0	761	0	561	0	2520	0
NAPFSGAPN(+.98)GNQM(+15.99)SCG	523.539	0.06	60	1.9	5.52	sp|Q14686|NCOA6_HUMAN	Deamidation (NQ); Oxidation (M)	4460.59	496.111	8.99111	0.0379069	0:0:0:0:0:0:1.00:0:0:0:0:0:0:0:0:0:0:0:2.66:0.27:0:1.26:0:0:2.04:0:0.30:0.46:0:0:0:0:1.49:0:0:0:0:0:0:0:0:0:0:0:0:0	0	0	0	0	0	0	8930	0	0	0	0	0	0	0	0	0	0	0	23800	2440	0	11300	0	0	18200	0	2640	4150	0	0	0	0	13300	0	0
QEKN(+.98)PLPSKETIEQEKQAGES	593.548	0.04	60	5.4	4.65	sp|P62328|TYB4_HUMAN	Deamidation (NQ)	10450.6	826.111	12.6503	0.0375894	0:0:0:0:0:0:1.00:0:0:0:0:0:0:0:0:0:1.23:1.37:0:0:4.75:0:14.32:9.81:0:0:0:0.76:0:0.61:0:1.11:0:1.09:10.57:0:0:0:0:0:0:0:0:0:0:0	0	0	0	0	0	0	4130	0	0	0	0	0	0	0	0	0	5090	5650	0	0	19600	0	59200	40500	0	0	0	3130	0	2540	0	4580	0	4510	43600
EVRGQ(+.98)VQMDVDLQSVDINQ(+.98)CASGPGWYSNTHLCDLNSTQ(+.98)CV	903.393	0.08	60	8.2	4.03		Deamidation (NQ)	1418.24	170.556	8.31539	0.036898	0:0:0:0:0:0:1.00:0:0:0:0:0:0:0:0:0:0:0:0:0.49:0:0:0:0:0:2.11:1.27:0.64:1.17:2.15:0:0:0:0:0:0:0:0:0:0:0:0:0:0:0:0	0	0	0	0	0	0	3070	0	0	0	0	0	0	0	0	0	0	0	0	1520	0	0	0	0	0	6480	3910	1980	3610	6610	0	0	0	0	0
TLIRKVFN	495.808	0.09	60	5.5	11			1760.59	808.111	2.17865	0.0367936	1.00:1.22:2.14:2.06:2.21:0:0:0:0:0:0:0.82:2.18:0:0:0:2.77:0:2.69:0:2.36:0:3.54:4.06:0:2.21:0:2.07:4.37:2.52:0:1.62:1.78:2.43:0:0:0:0:0:0:0:0:0:0:0:0	1010	1230	2170	2080	2230	0	0	0	0	0	0	826	2200	0	0	0	2800	0	2710	0	2380	0	3570	4090	0	2230	0	2090	4420	2550	0	1630	1800	2460	0
SPPKRGPLP	474.786	0.03	60	2	11			558.235	39.7778	14.0338	0.0367624	0:0:0:0:1.00:0:0:0:0:0:0:0:0:0:0:0:0:0:4.08:1.91:1.83:0:3.92:0:0:0:0:0:1.51:0:0:0:0:0:0:0:0:0:0:0:0:0:0:0:0:0	0	0	0	0	716	0	0	0	0	0	0	0	0	0	0	0	0	0	2920	1370	1310	0	2810	0	0	0	0	0	1080	0	0	0	0	0	0
SSSGQHGSGLGESSGFGHHESSSGQSSSYSQ	1009.41	0.04	60	5.4	5.71			55.6471	624.444	0.0891145	0.0366327	0:0:1.00:1.20:0:0.99:0:0:1.46:0:0:0:1.08:0:0:0:0:0:0:0:0:0:0:0:0:0:0:0:0:0.48:0:0:0:0:0:0:0:0:0:0:0:0:0:0:0:0	0	0	1960	2360	0	1940	0	0	2860	0	0	0	2120	0	0	0	0	0	0	0	0	0	0	0	0	0	0	0	0	946	0	0	0	0	0
KFSPGAPGGSGSQPNQKLGHPEAL	591.053	0.02	60	9	8.6	sp|Q15942|ZYX_HUMAN		1626.47	0	#DIV/0!	0.0358146	0:0:0:0:0:0:0:0:0:0:0:0:0:0:0:0:0:0:0:0:0:0:1.00:0.76:0:0:0:0:0:0:0:0:0:0.47:0.97:0:0:0:0:0:0:0:0:0:0:0	0	0	0	0	0	0	0	0	0	0	0	0	0	0	0	0	0	0	0	0	0	0	8630	6600	0	0	0	0	0	0	0	0	0	4070	8350
ISRPVGVSKPIGVSKPVTIGKPVGVSKPIGISKPVSVGRP	994.348	0.03	5.33	7.9	12.04			191.765	1343.28	0.142759	0.0353507	0:0.25:0:0:0:0:0:0:2.52:1.00:0.75:0:0:1.51:2.22:0:0:2.18:0:0:0:0:0:0:0:0:0:0:0:0:0.81:0:0:0.60:0:0.87:0.75:0:0.37:1.28:0.34:0:0:0:0.47:0	0	579	0	0	0	0	0	0	5830	2320	1740	0	0	3500	5150	0	0	5060	0	0	0	0	0	0	0	0	0	0	0	0	1880	0	0	1380	0
LRQLALLLWKNYTLQ(+.98)KRKVLVT	675.423	0.01	60	9.3	11.17		Deamidation (NQ)	0	597.389	0	0.0349054	0:1.00:0:0:0:0:1.71:0:0:0:0:0:0:1.29:2.38:0:0:0.57:0:0:0:0:0:0:0:0:0:0:0:-:0:0:0:0:0:0:0:0.37:1.25:0:0:0:0:0:0.55:1.92	0	1550	0	0	0	0	2640	0	0	0	0	0	0	2000	3680	0	0	883	0	0	0	0	0	0	0	0	0	0	0	0	0	0	0	0	0
QGIMGMNYSSQ(+.98)M(+15.99)SQ(+.98)GPIA	639.934	0.04	60	7.4	5.52		Deamidation (NQ); Oxidation (M)	0	790.556	0	0.0348702	0.43:0:0:0:0:0:0:0:0:1.00:0.77:0:0:0:0:0:0.26:0.50:0:0:0:0:0:0:0:0:0:0:0:0:0:0:0:0:0:0:0:0:0:0:0:0:0:0:0:0	2070	0	0	0	0	0	0	0	0	4800	3720	0	0	0	0	0	1230	2410	0	0	0	0	0	0	0	0	0	0	0	0	0	0	0	0	0
RRVGT	588.353	0.1	60	4.4	12	sp|Q8NFP9|NBEA_HUMAN		319.412	1654.67	0.193037	0.0348512	1.00:1.08:0.43:0:0.19:0:0:1.00:2.18:0:1.45:1.59:0:0:0:0:0:0:0:0:0:0:0:0:0:0:0:0:0:0.89:0:0.74:0:0:0:0:0:0:0:0:0:0:0:0:0:0	3340	3600	1430	0	644	0	0	3330	7270	0	4850	5320	0	0	0	0	0	0	0	0	0	0	0	0	0	0	0	0	0	2970	0	2460	0	0	0
HPGMPGGM(+15.99)GT	957.409	0.12	60	9.6	6.74		Oxidation (M)	0	413.333	0	0.0347843	1.00:0.76:0:0:0.90:0:0:1.19:0:0:0:0:0:0.15:0:0:0:0:0:0:0:0:0:0:0:0:0:0:0:0:0:0:0:0:0:0.65:0:0:0.96:0.69:0.83:0.92:0:0:0:0	1860	1410	0	0	1670	0	0	2220	0	0	0	0	0	280	0	0	0	0	0	0	0	0	0	0	0	0	0	0	0	0	0	0	0	0	0
YVHPALVGKDKKGRAPIPPL	1078.65	0.04	3.76	8.7	10			2297.53	807.778	2.84426	0.0344778	0:0:0:0:0:1.00:1.43:0:0:0:0:0:0:0:0.80:0.73:0.67:0:0.34:1.95:0:0:2.56:0:0.76:0:0.82:0.86:0:1.01:1.36:1.41:0.08:1.30:0:0:0:0:0:0.47:0:0:0:0.60:0:0	0	0	0	0	0	3140	4480	0	0	0	0	0	0	0	2520	2310	2090	0	1070	6110	0	0	8030	0	2400	0	2560	2700	0	3160	4280	4420	248	4080	0
GITYKPGDNYPVQFIPSTM(+15.99)AAAAASGLSPLQ(+.98)LQKGHVS	983.737	0.06	60	5.4	8.44		Oxidation (M); Deamidation (NQ)	2620.71	0	#DIV/0!	0.0344218	0:0:0:0:0:0:0:0:0:0:0:0:0:0:0:0:0:0:0:1.00:0:1.33:0:0:0:0:0:0:0.10:0:1.66:0:2.25:0:0:0:0:0:0:0:0:0:0:0:0:0	0	0	0	0	0	0	0	0	0	0	0	0	0	0	0	0	0	0	0	7040	0	9340	0	0	0	0	0	0	672	0	11700	0	15800	0	0
N(+.98)PGGDFGKKELSP	673.831	0.07	60	3.8	6.07		Deamidation (NQ)	3560	8880	0.400901	0.0342691	0:1.00:3.21:1.36:0:2.82:1.66:0.41:3.23:0:2.60:3.13:0.64:1.34:0:1.31:0.74:0:2.85:0.77:0:0.88:0:0:2.09:0:0:1.07:0.51:0:0:0:0.72:0:0:0:0:0:0:0:0:0:0:0:0:0	0	6820	21900	9240	0	19300	11300	2830	22000	0	17700	21300	4350	9130	0	8950	5020	0	19400	5220	0	6030	0	0	14200	0	0	7270	3470	0	0	0	4930	0	0
PKATPVAAAKTK	1182.71	0.06	5.5	9.4	10.31			918.682	256.473	3.58198	0.0339705	0:1.00:1.18:0:0.59:0:0.06:0:0.01:0:0:0:0:0:0.36:1.54:0:0:0:0.03:1.97:0.73:1.52:1.54:0.30:0.45:0.30:4.64:2.28:0:1.12:0:0.73:0:0.37:0:0.98:0:0:0:0:0:0:1.24:0:0	0	977	1150	0	577	0	55	0	9.52	0	0	0	0	0	348	1500	0	0	0	29.6	1930	712	1490	1500	288	439	298	4530	2230	0	1090	0	717	0	364
GGLRPN	613.344	0.01	60	7.9	9.75			549.941	16.9444	32.4555	0.0339128	0:0:0:0:0:0:0:0:0:0:0:0:0:0:0:1.00:0:0:0:0:7.31:3.95:0:11.03:0:0:0:0:0:0:0:2.13:0:0:6.18:0:0:0:0:0:0:0:0:0:0:0	0	0	0	0	0	0	0	0	0	0	0	0	0	0	0	305	0	0	0	0	2230	1210	0	3370	0	0	0	0	0	0	0	649	0	0	1890
NSCPP	517.207	0.06	60	2.6	5.52			843.647	41.0556	20.5489	0.0334421	0:0:0:0:0:0:0:0:0:0:0:0:0:1.00:0:0:0:0:0:0:0:1.17:0:5.38:0:5.83:2.71:0:0:0:0:0:0:4.30:0:0:0:0:0:0:0:0:0:0:0:0	0	0	0	0	0	0	0	0	0	0	0	0	0	739	0	0	0	0	0	0	0	862	0	3980	0	4310	2010	0	0	0	0	0	0	3180	0
Q(-17.03)NILLLVLAM	1110.67	0.17	3.23	7.3	5.52		Pyro-glu from Q	1272.29	597.833	2.12818	0.0333305	0:0:0.06:0.07:0.67:0.21:0.08:0:0:1.00:0:0.36:0:0:0.05:0.25:0.21:0:0.24:0.28:0.42:0.33:0.45:0.34:0.21:0.32:0.26:0.37:0.04:0.14:0.85:0.21:0.79:0.57:0.14:0.45:0.13:0:0:0.35:0:0:0.53:0.12:0:0	0	0	207	261	2440	779	295	0	0	3620	0	1310	0	0	174	915	760	0	859	1030	1510	1210	1640	1240	764	1150	938	1360	129	496	3090	766	2860	2070	517
Q(-17.03)EKPSSPSPMPSSTPSPSLNLG	736.684	0.02	60	9.2	6		Pyro-glu from Q	2479.35	448.333	5.53016	0.0333085	0:0:0:0:0:0:0:0:0:0:0:0:0:1.00:0.45:0:0:0:0:0:0.83:0:1.16:0:0:0.99:0.06:0:1.13:1.62:0:0:0:0:1.77:0:0:0:0:0:0:0:0:0:0:0	0	0	0	0	0	0	0	0	0	0	0	0	0	5570	2500	0	0	0	0	0	4650	0	6480	0	0	5530	339	0	6290	9020	0	0	0	0	9840
HATPLPKK	891.547	0.06	3.29	6.2	10			85.5882	385.889	0.221795	0.0330944	0.70:0:0.99:0:0.65:0.15:0:0:0:1.00:0:0:0:1.82:0:0:0.71:0.78:0.16:0.24:0:0:0:0:0:0.33:0:0:0:0:0:0:0.10:0.23:0.37:1.06:1.66:0:0:0.26:0.25:0.41:0:0.20:0.13:0	715	0	1010	0	659	156	0	0	0	1020	0	0	0	1860	0	0	730	796	161	246	0	0	0	0	0	337	0	0	0	0	0	0	100	230	381
RGLRRVM	887.547	0.06	3.56	6.1	12.3			125.353	588.222	0.213105	0.0329615	1.34:0:0.84:0.32:1.64:2.72:0:0:0:1.00:0.16:0:0:4.66:0.35:1.43:0:1.06:0.94:0:0.43:0:0:0.48:0.73:0.30:0:0:0.24:0:0:0:0:0:0:3.16:7.71:0:0:0.48:0:0:2.25:1.57:0.07:0	914	0	573	217	1120	1860	0	0	0	683	106	0	0	3180	237	975	0	723	644	0	292	0	0	329	500	204	0	0	162	0	0	0	0	0	0
QAQ(+.98)SGPQG	773.309	0.06	60	7.9	5.52		Deamidation (NQ)	119.059	946.111	0.12584	0.032945	0:0:0:1.00:0.53:0:0.30:0:1.11:0:0:0:0.26:0.72:0:0:0:0.25:0:0:0:0:0:0:0:0.25:0:0:0:0:0.24:0:0:0:0:0:0:0:0:0:0:0:0:0:0:0	0	0	0	4080	2170	0	1240	0	4530	0	0	0	1070	2920	0	0	0	1020	0	0	0	0	0	0	0	1030	0	0	0	0	994	0	0	0	0
QPPRISKAQK	1152.68	0.01	60	5.5	11.17			359.035	72.1667	4.97508	0.032941	0:0:0:0:0:0:1.00:0:0:0:0:0:0:0:0:5.53:0:0:0:0:3.82:2.65:8.20:4.59:0:2.03:0.31:0:0:3.98:0:0:4.00:0:1.09:0:0:0:0:0:0:0:0:0:0:0	0	0	0	0	0	0	199	0	0	0	0	0	0	0	0	1100	0	0	0	0	761	527	1630	914	0	403	62.6	0	0	793	0	0	797	0	216
PSSVAQSNFPQ(+.98)GSGASEM(+15.99)VSN(+.98)QP	1162.48	0.26	60	8.2	4		Deamidation (NQ); Oxidation (M)	1450.59	4682.22	0.309808	0.0322424	1.00:1.23:3.76:2.76:0:1.24:3.00:0:4.41:0:0:5.34:0.71:0:0:0:1.20:1.70:2.48:1.76:0:1.86:0:0:0:0:0:0.50:0:0.28:0:0.45:0.38:0:0:0:0:0:0:0:0:0:0:0:0:0	3200	3940	12000	8830	0	3980	9610	0	14100	0	0	17100	2260	0	0	0	3830	5430	7930	5620	0	5940	0	0	0	0	0	1610	0	900	0	1450	1210	0	0
KSRLSN(+.98)LIKLAQKVPT	599.698	0.03	60	8.9	11.26		Deamidation (NQ)	482.941	0	#DIV/0!	0.0321329	0:0:0:0:0:0:0:0:0:0:0:0:0:0:0:0:0:0:0:0:1.00:0:0:0:0:0:1.44:0.91:0:1.08:0:0:0:0:0:0:0:0:0:0:0:0:0:0:0:0	0	0	0	0	0	0	0	0	0	0	0	0	0	0	0	0	0	0	0	0	1850	0	0	0	0	0	2670	1690	0	2000	0	0	0	0	0
E(-18.01)KPGGKKVAV	994.609	0.01	5.34	10.3	9.71		Pyro-glu from E	11.3059	81.2778	0.139102	0.0315203	0:0:0.69:2.02:1.39:0:0:0:0:1.00:0:0.54:0:0:0:0.39:1.49:0:0:0:0:0.60:0:0:0:0:0:0:0.15:0:0:0:0.24:0:0:3.60:0:0:0:0:0:0:25.48:0:0.14:0	0	0	134	393	270	0	0	0	0	194	0	105	0	0	0	76	291	0	0	0	0	117	0	0	0	0	0	0	28.3	0	0	0	46.9	0	0
PRVPKYV	858.532	0.03	4.94	5.3	10.01			43.2353	256.05	0.168855	0.0311992	0:0:0:-:0.18:2.20:1.25:0:0:1.00:0:2.71:2.40:0:2.54:0:0:0.31:0:0:0:0:0:0.14:0:0.56:0:0:0:0.62:0:0:0:0.69:0:9.34:0:0:0:0:1.96:0:0.67:0:2.01:2.92	0	0	0	0	64.9	807	458	0	0	366	0	991	879	0	930	0	0	113	0	0	0	0	0	50	0	204	0	0	0	227	0	0	0	254	0
TGHLASSVLISTTQPVVS	898.994	0.02	5.52	6.4	6.4			188.882	2195.28	0.0860403	0.0311803	1.00:0.34:0:3.71:1.09:3.27:0:0:0:0:0:3.30:8.62:5.47:0:0:0:0:0:0:0:0:0:0:0.26:0:0:0:0:0:0:0:0:1.91:0:5.13:0:0:0:0.83:0:0:2.55:0:22.04:6.36	1480	495	0	5480	1600	4820	0	0	0	0	0	4860	12700	8080	0	0	0	0	0	0	0	0	0	0	381	0	0	0	0	0	0	0	0	2830	0
QSGAAPGAPSLSFTVQV	808.902	0.03	60	11.5	5.52			1611.76	0	#DIV/0!	0.0310383	0:0:0:0:0:0:0:0:0:0:0:0:0:0:0:0:0:0:0:1.00:0:0:0:0:0:0:1.01:2.77:0.29:4.95:0:0:0:0:3.06:0:0:0:0:0:0:0:0:0:0:0	0	0	0	0	0	0	0	0	0	0	0	0	0	0	0	0	0	0	0	2090	0	0	0	0	0	0	2110	5790	610	10400	0	0	0	0	6400
SPLSKYRAL	1034.62	0.05	5.52	9.3	9.99			198.059	62.8611	3.15074	0.03101	1.04:0:0:0:0:0:0:0:0.13:1.00:0:0:0:0:0:1.48:0:1.73:2.88:0:2.82:0:1.44:0.78:0:1.79:0:1.28:1.45:0:0:1.22:2.36:0:0:4.04:9.68:0:8.46:0:0:0:7.40:1.73:0.26:0	218	0	0	0	0	0	0	0	27.5	210	0	0	0	0	0	311	0	365	605	0	593	0	302	165	0	376	0	270	304	0	0	256	496	0	0
SKTKRHLV	968.598	0.06	3.38	6.7	11.17			90.0824	444.094	0.202845	0.0308883	0.04:0:0.86:0:2.23:0.01:0:0.33:0.97:1.00:0:1.36:0:0:0.49:0.06:0.66:0:0:0:0:0:0.20:0.04:0.08:0:0.39:0:0:0:0:0.59:0.02:0.24:0:0.10:0.25:0:0:1.05:0.22:0:0.22:0:0.21:0	42.6	0	860	0	2220	14.9	0	329	968	995	0	1350	0	0	491	64.2	659	0	0	0	0	0	195	35.5	76.3	0	385	0	0	0	0	585	19.6	235	0
KVSAK	532.357	0.02	60	10.7	10			4.85882	148.389	0.0327439	0.0307535	0:0:1.00:0.50:0:0:0:0:0.90:0:0:0:0.67:0:0:0:0.46:0:0:0:0:0:0:0:0:0:0:0:0:0:0.11:0:0:0:0:0:0:0:0:0:0:0:0:0:0:0	0	0	755	376	0	0	0	0	681	0	0	0	509	0	0	0	350	0	0	0	0	0	0	0	0	0	0	0	0	0	82.6	0	0	0	0
KIFVLI	732.502	0.15	60	5.9	8.75			2093.24	767.222	2.72833	0.0304548	0:0:0:0:1.00:3.45:0:0:0:0:0:0.86:0:0:4.58:0.82:0:0:2.44:0:0:2.34:2.70:2.33:0.57:3.63:1.50:2.06:4.29:0.39:0.51:0.45:0.41:3.46:0.53:0:0:0:0:0:0:0:0:0:0:0	0	0	0	0	1290	4450	0	0	0	0	0	1110	0	0	5910	1050	0	0	3150	0	0	3010	3480	3000	736	4680	1940	2650	5530	504	664	577	524	4460	680
L(+42.01)LWLLRGLTLGTAPRRAVRGQAG	839.842	0.05	5.3	7	12.48		Acetylation (Protein N-term)	826.706	3943.44	0.209641	0.0302016	1.00:0.58:0.04:0.58:0:0:0.53:0:0.94:0:0.09:0.57:0.11:0:0:0:0.08:0:0:0:0:0:0:0:0:0.13:0:0.06:0.08:0.05:0:0.18:0.38:0:0:0:0.04:0.09:0:0:0.01:0:0.10:0.05:0.02:0	15700	9200	612	9110	0	0	8280	0	14700	0	1410	8930	1720	0	0	0	1320	0	0	0	0	0	0	0	0	2080	0	1010	1300	774	0	2850	6040	0	0
VKDGPRAHAYK	621.343	0.05	60	8.8	9.7			649.412	0	#DIV/0!	0.0300956	0:0:0:0:0:0:0:0:0:0:0:0:0:0:0:0:0:0:0:0:0:0:1.00:1.21:0:1.27:1.00:0:0:0:0:0:0:0:0:0:0:0:0:0:0:0:0:0:0:0	0	0	0	0	0	0	0	0	0	0	0	0	0	0	0	0	0	0	0	0	0	0	2460	2990	0	3140	2450	0	0	0	0	0	0	0	0
QERGDNDISPFSGDQPFKN	717.663	0.03	60	2.7	4.23			22.1176	936.111	0.0236272	0.0300366	0:0:0:0:0:0:0:1.00:1.25:0:1.82:0:0:1.31:0.65:0:0:0:0:0:0:0:0:0:0:0:0:0:0:0.13:0:0:0:0:0:0:0:0:0:0:0:0:0:0:0:1.42	0	0	0	0	0	0	0	2790	3480	0	5080	0	0	3670	1830	0	0	0	0	0	0	0	0	0	0	0	0	0	0	376	0	0	0	0	0
RRLLESLRGPALDVIRVLKIN(+.98)N(+.98)PLITV	1024.29	0.12	4.37	8.3	11.54		Deamidation (NQ)	3888.65	1865.5	2.08451	0.029717	0:1.00:0.77:0:1.35:0.17:0.04:0:0.26:0:0.15:0.12:0:0.57:0.27:0:0.73:0.46:1.10:1.99:0:1.27:1.15:0.57:0.13:0.42:0.68:0:0.58:0.29:0.53:0.25:0.76:0.98:0.95:0:0.32:0:0.34:0.66:0:0.46:0.91:0.49:0:0	0	5690	4400	0	7690	974	240	0	1500	0	826	689	0	3230	1540	0	4180	2620	6230	11300	0	7200	6530	3250	717	2370	3840	0	3300	1630	3040	1420	4300	5570	5410
KERELEEARKKLAQIRQQ	564.075	0.1	60	6.4	9.69			1387	290.556	4.77361	0.0297109	0:0:0:0:0:0:0:0:0:0:0:0:1.00:0.38:0:0:0:0:0:0:0.36:0:1.00:1.03:0:0:0:0.30:0.12:1.15:0:0:0.35:0.55:1.38:0:0:0:0:0:0:0:0:0:0:0	0	0	0	0	0	0	0	0	0	0	0	0	3780	1450	0	0	0	0	0	0	1350	0	3800	3890	0	0	0	1140	439	4350	0	0	1330	2070	5210
Q(-17.03)EKNPLPSKETIEQE	876.933	0.04	60	2.4	4.49	sp|P62328|TYB4_HUMAN	Pyro-glu from Q	5130	594.444	8.62991	0.0293898	0:0:0:0:0:0:0:0:0:0:0:0:0:0:0:0:1.00:0:0:0:1.33:0:1.82:1.66:0:0:0:0:0:0:0:0.51:0:0.78:2.10:0:0:0:0:0:0:0:0:0:0:0	0	0	0	0	0	0	0	0	0	0	0	0	0	0	0	0	10700	0	0	0	14100	0	19400	17700	0	0	0	0	0	0	0	5420	0	8290	22300
GPLGPWGSM(+15.99)SSGPW	716.336	0.02	5.68	9.1	5.52		Oxidation (M)	145.294	1553.06	0.0935537	0.0293003	1.00:0.78:0:0.42:0:0:0:0.91:0:0:0.15:0:0.68:0.15:0:0:0.17:2.14:0:0:0:0:0:0:0:0:0:0:0:0:0:0:0:0.57:0:0:0:1.15:0.61:0:0:0:0:0:0.17:0.25	4370	3400	0	1860	0	0	0	3970	0	0	644	0	2960	635	0	0	746	9370	0	0	0	0	0	0	0	0	0	0	0	0	0	0	0	2470	0
PGPGGPGPAGPM(+15.99)GPFNPGPFNQGPPGAPPHAGGPPP	813.144	0.07	4.44	11.3	7.17		Oxidation (M)	340	1617.78	0.210165	0.0292645	0.72:0.42:0.20:0:0:0:0:0.81:0.70:1.00:0.91:0.50:0:0:0.64:0:0:0:0:0:0:0:1.17:0:0:0:0:0:0:0:0:0:0:0:0:0:0:0.42:0:0:0:0:0:0:0.57:0	3560	2080	1000	0	0	0	0	3990	3450	4940	4490	2460	0	0	3150	0	0	0	0	0	0	0	5780	0	0	0	0	0	0	0	0	0	0	0	0
LLSVLLYAT	496.814	0.05	60	5.1	5.52			1349.41	230	5.86701	0.0292633	0:0:0:0:0:0:1.00:0:0:0:0:0:0:0:1.23:0:0:0:3.05:1.06:0:0.64:0:1.69:0:0:0:0:1.49:3.01:0:0:1.43:0:0:0:0:0:0:0:0:0:0:0:0:0	0	0	0	0	0	0	1850	0	0	0	0	0	0	0	2290	0	0	0	5650	1970	0	1190	0	3130	0	0	0	0	2760	5580	0	0	2660	0	0
GAATT	420.22	0.08	5.99	3.9	5.52			316.471	1358.78	0.232908	0.0287709	23.25:22.40:10.61:18.76:0:7.23:0:0:40.50:1.00:0:46.76:0:27.08:0:0:0:12.36:0:0:0:0:0:0:0:17.54:14.15:0:0:0:0:0:0:0:14.55:0:0:0:0:1.72:0:0:0:0:1.36:0	2710	2610	1240	2180	0	842	0	0	4720	116	0	5450	0	3150	0	0	0	1440	0	0	0	0	0	0	0	2040	1650	0	0	0	0	0	0	0	1690
SKGIKGGKKVY	1164.7	0.09	2.72	8.3	10.18			392.341	166.667	2.35405	0.0286254	0:0:0:1.00:1.40:0:2.94:0:0:0:0:0:0:0:0.94:1.22:0.59:0:0.76:0.63:1.35:1.37:1.10:2.65:2.44:0.70:0.49:0:0:1.50:1.50:0.73:0.19:0.64:1.88:0:0:0:0:0.61:0:0:0:2.12:0:0	0	0	0	372	519	0	1090	0	0	0	0	0	0	0	348	452	219	0	283	236	503	511	410	984	905	262	184	0	0	558	557	271	69.8	237	699
HLSQDTGSPSGMRPWEDLPSQDTGSPS	957.093	0.14	60	2.9	4.22			2599.06	5486.11	0.473752	0.0285803	1.00:0:0.87:2.14:1.09:0:1.59:1.33:1.43:0:1.37:1.35:0:1.39:0.84:1.13:0:1.69:0.62:0.82:0:0:0:0:0.24:0.61:2.09:0.25:0.34:0:0.10:1.15:0:1.48:0:0:0:0:0:0:0:0:0:0:0:0	5730	0	4980	12300	6230	0	9130	7650	8200	0	7870	7730	0	7950	4800	6490	0	9690	3580	4710	0	0	0	0	1380	3480	12000	1420	1960	0	584	6590	0	8480	0
RELWVCEGGGV	602.788	0.15	60	6.1	4.53			160	1747.22	0.0915739	0.0280816	0:0:1.00:1.52:0:0:1.06:1.23:0.75:0:6.40:2.66:14.71:3.91:0:0.77:1.71:4.13:0:0:0:1.51:0:0:0.62:0:0:0.75:0.56:0:0:0:0:0:0:0:0:0:0:0:0:0:0:0:0:0	0	0	789	1200	0	0	837	973	591	0	5050	2100	11600	3090	0	610	1350	3260	0	0	0	1190	0	0	493	0	0	593	444	0	0	0	0	0	0
GRIYIQAHIDRDVLIVLVRDAKN(+.98)L	931.23	0.02	5.26	13.8	8.59		Deamidation (NQ)	32.3529	489.167	0.0661389	0.0279577	1.00:3.73:0.68:4.79:1.08:0:0:0:0:0:1.22:0:0:0:0:0:3.08:7.42:1.32:0:0:0:0:0:0:0:0:0:0:0:0:0:0.11:0:0:7.58:1.99:0:0:0:14.15:0:17.23:0:0:0	383	1430	262	1830	414	0	0	0	0	0	466	0	0	0	0	0	1180	2840	506	0	0	0	0	0	0	0	0	0	0	0	0	0	44	0	0
KN(+.98)ASDGALM(+15.99)DDNQN	755.316	0.03	60	11	3.93		Deamidation (NQ); Oxidation (M)	0	1731.11	0	0.0276923	1.00:0.62:0:1.07:0:0:0:0:0.39:0:0:0:1.13:0:0:0:0:0:0:0:0:0:0:0:0:0:0:0:0:0:0:0:0:0:0:0:0:0:0:0:0:0:0:0:0:0	7400	4610	0	7890	0	0	0	0	2870	0	0	0	8390	0	0	0	0	0	0	0	0	0	0	0	0	0	0	0	0	0	0	0	0	0	0
VPGGVVAVGRLD	1138.68	0.03	60	8.2	5.81			829.541	148.667	5.57987	0.0276214	0:0:0:1.00:1.63:0.83:0:0:0:0:0:0:0:0:0:0:0:0:1.07:1.48:2.26:0:1.12:0.75:0.05:0.18:6.42:0:0:0.61:0.37:2.00:1.07:0.84:0:0:1.67:0:0:0:0:0:0:0.07:0:0	0	0	0	773	1260	643	0	0	0	0	0	0	0	0	0	0	0	0	824	1150	1750	0	863	580	42.2	139	4970	0	0	472	284	1550	828	650	0
PAAAGG	443.224	0.03	60	4.9	5.96			538	93.9444	5.72679	0.027357	2.75:0:0:0:0:0:0:0:0:1.00:0:0:0:0:0:0:0:0:4.44:1.98:0:0:4.10:3.20:0:0:0:0:0:2.92:0:0:3.06:0.58:0:2.16:0:1.00:0:2.83:0:2.57:0:0:0:0	1240	0	0	0	0	0	0	0	0	451	0	0	0	0	0	0	0	0	2000	894	0	0	1850	1440	0	0	0	0	0	1320	0	0	1380	262	0
KATPVAAAKT	957.578	0.23	2.44	6.4	10			822.941	1740.28	0.472879	0.0269606	4.47:18.94:13.93:14.74:13.84:1.13:0:31.55:10.67:1.00:10.27:18.30:0:0:3.36:12.97:7.93:12.86:4.79:3.88:4.22:6.39:13.57:7.41:1.71:2.53:4.25:3.33:0:0:3.03:7.18:2.73:10.99:2.49:4.58:15.74:0:10.88:12.81:1.14:15.55:6.91:19.93:48.29:11.30	796	3370	2480	2620	2460	202	0	5620	1900	178	1830	3260	0	0	599	2310	1410	2290	853	691	752	1140	2420	1320	305	451	756	593	0	0	540	1280	486	1960	443
GLSAGCGSGSSSVTPN(+.98)SGGTPFSQDT	1180.01	0.12	60	4.9	3.8		Deamidation (NQ)	87.0588	1217.22	0.0715225	0.0268961	0:1.00:0:0:0:0:0:0:0:0:1.07:1.12:2.55:0:0:0:2.55:2.46:0:0:0:0:0:0:0:0:0:0:0:0:0:0.73:0:0:0:0:0:0:0:0:0:0:0:0:0:0	0	2040	0	0	0	0	0	0	0	0	2180	2280	5200	0	0	0	5200	5010	0	0	0	0	0	0	0	0	0	0	0	0	0	1480	0	0	0
REAVSGRYSLFCLGF	568.949	0.05	60	2.4	8.22			893.294	0	#DIV/0!	0.0268889	0:0:0:0:0:0:0:0:0:0:0:0:0:0:0:0:0:0:0:0:1.00:0:2.29:1.38:0:0:0:0:0:0:0:0.41:0:0:1.89:0:0:0:0:0:0:0:0:0:0:0	0	0	0	0	0	0	0	0	0	0	0	0	0	0	0	0	0	0	0	0	2180	0	4990	3010	0	0	0	0	0	0	0	886	0	0	4120
Q(-17.03)EKKAQ(+.98)LKIYKKFLKKAQDL	1216.74	0.02	60	10.8	10	sp|Q8WXH0|SYNE2_HUMAN	Pyro-glu from Q; Deamidation (NQ)	690	68.7222	10.0404	0.0267542	0:0:0:1.00:0:0:0.15:0:0:0:0:0:0:0:0:0:0:0:0:0:0:0:1.23:2.24:0:2.58:0:0:2.98:0:0:1.01:0.82:0:0:0:0:0:0:0:0:0:0:0:0:0	0	0	0	1080	0	0	157	0	0	0	0	0	0	0	0	0	0	0	0	0	0	0	1330	2420	0	2780	0	0	3220	0	0	1090	890	0	0
RDVFIAVKT	1048.63	0.2	3.62	9	8.75			446.553	1653.72	0.270029	0.0266774	1.64:0:0.18:0.18:0.12:0.41:3.02:0.14:0.35:1.00:0.09:0.41:1.48:0.24:0.10:0.54:0.14:0.81:0.28:0.10:0.14:0.15:0.45:0.29:0.37:0.03:0.05:0.06:0:0.07:0.14:0.36:0.26:0:0.01:0.04:0.38:0:0.51:0.38:0.19:0.02:0.22:0.06:0.13:0	4490	0	496	483	333	1140	8280	375	969	2740	251	1130	4070	666	264	1480	390	2210	759	275	373	415	1230	800	1030	93.2	140	171	0	205	389	981	712	0	18.2
EFVSETESRGSESGIFTNTKESSSHHPGIAEFPSRG	776.963	0.03	60	2.7	5.06	sp|P02671|FIBA_HUMAN		3290	486.667	6.76027	0.0266438	0:0:0:0:0:0:0:0:0:0:0:0:0:1.00:0:0:0:0:0:0:1.14:0:1.59:1.02:0:0.85:1.03:0:0:0:0:0.38:0:0.37:0:0:0:0:0:0:0:0:0:0:0:0	0	0	0	0	0	0	0	0	0	0	0	0	0	8760	0	0	0	0	0	0	10000	0	13900	8970	0	7440	9060	0	0	0	0	3290	0	3270	0
E(-18.01)EEELEEEDEAS	710.27	0.01	60	9.6	3.28		Pyro-glu from E	12.1118	398.778	0.0303722	0.0266233	1.00:3.05:0.99:0:0:0:0:2.41:0:0:0:1.98:0.66:0:0:0:0:0:0.22:0:0:0:0:0:0:0:0:0:0:0:0.07:0:0:0:0:0:0:0:0:0:0:0:0:0:0:0	711	2170	707	0	0	0	0	1710	0	0	0	1410	470	0	0	0	0	0	154	0	0	0	0	0	0	0	0	0	0	0	51.9	0	0	0	0
EAQGGA	532.231	0.16	60	4.9	4			0	824.444	0	0.0265495	0:0.70:0:0:0:0:0:0.70:0:1.00:0.36:0:0:0:0:0:0:0.54:0:0:0:0:0:0:0:0:0:0:0:0:0:0:0:0:0:0:0.62:1.14:0.84:0:1.55:0:0.59:0.33:0.74:0.32	0	3150	0	0	0	0	0	3160	0	4500	1610	0	0	0	0	0	0	2420	0	0	0	0	0	0	0	0	0	0	0	0	0	0	0	0	0
DDPDAPLQPVTPLQLFEGR	703.358	0.09	2.42	9	3.84			2608.24	1246.11	2.0931	0.0264413	0.80:0:0.29:0:0:0:0.52:0:0.57:1.00:0:0:0:0:0.75:0.56:0.61:0.80:1.11:0.40:0.77:0.45:1.03:1.74:0.27:1.09:0.30:0:0.41:0.67:0.73:0:0.28:1.85:0.57:0:0:0:0:0:0.16:0:1.84:0.09:0:0	3050	0	1100	0	0	0	1990	0	2160	3800	0	0	0	0	2860	2110	2330	3030	4230	1520	2930	1720	3920	6610	1040	4140	1130	0	1560	2540	2770	0	1050	7020	2160
KSAWIRDYSSGGSSRTLDAQ(+.98)D	1151.01	0.31	60	5.6	6.04		Deamidation (NQ)	2065.29	12853.3	0.160682	0.0262616	1.00:1.61:0.50:1.10:0.65:0:0.56:0.97:0.71:0:12.37:4.98:2.97:1.58:0:0.92:3.37:2.51:1.92:0:0:0:0:0:0.54:0:0:1.18:0:0.19:0:0:0.81:0.80:0:0:0:0:0:0:0:0:0:0:0:0	6460	10400	3230	7130	4230	0	3630	6260	4580	0	79900	32200	19200	10200	0	5940	21800	16200	12400	0	0	0	0	0	3460	0	0	7620	0	1220	0	0	5240	5170	0
ESHKKFNIKIKPLQ(+.98)SKDILKNAATVDELK	1112.98	0.02	60	7.2	9.61		Deamidation (NQ)	1408.24	121.111	11.6276	0.0261897	0:0:0:0:0:1.00:0:0:0:0:0:0:0:0:0:0:0:0:3.25:0:1.33:2.80:0:0:0:1.16:0:0:0:0:1.54:0:0.90:0:0:0:0:0:1.42:2.14:1.76:0:0:0:0:0	0	0	0	0	0	2180	0	0	0	0	0	0	0	0	0	0	0	0	7090	0	2900	6100	0	0	0	2530	0	0	0	0	3360	0	1960	0	0
GLRGLAVSGL	942.569	0.24	3.91	6.2	9.75			6616.06	3261.89	2.02829	0.0256995	1.08:0.19:1.66:0.18:0.28:0.10:3.05:1.07:1.67:1.00:3.52:2.40:1.31:0.30:0.91:0.49:1.95:0.19:3.36:3.59:7.40:1.29:5.55:0.19:0.49:3.15:4.01:1.68:0.74:1.04:2.99:1.80:0.68:1.88:1.08:1.91:2.84:0:0.43:0.65:0.27:2.24:0.19:0.58:0.07:0	2980	510	4570	507	777	281	8400	2930	4580	2750	9670	6590	3610	837	2490	1350	5350	532	9230	9870	20300	3560	15300	533	1360	8660	11000	4630	2030	2850	8210	4940	1860	5170	2970
DSGEGDFLAEGGG	605.745	0.32	60	3.4	3.43	sp|P02671|FIBA_HUMAN		2115.88	6362.22	0.33257	0.025575	1.00:1.04:1.12:0:1.66:0:0:0:0:0:3.56:0:3.14:5.04:1.62:1.36:3.93:2.07:0.96:0.58:0:0:0:0:1.26:0:0:0:0.74:1.37:0.42:0:1.42:0:1.27:0:0:0:0:0:0:0:0:0:0:0	4480	4650	5010	0	7440	0	0	0	0	0	16000	0	14100	22600	7250	6120	17600	9270	4310	2610	0	0	0	0	5660	0	0	0	3320	6160	1860	0	6360	0	5690
LQVGIPVA	796.485	0.05	5.08	10.7	5.52			78	752.389	0.10367	0.0255684	2.26:0:0:0:0:0.44:0:1.18:0:1.00:0.66:0.07:0.20:0.50:0.59:0:0:0:0:0:0.11:0:0:0.07:0:0:0.21:0:0:0:0:0.28:0:0:0:0.22:0:0:1.29:0:0.66:0.27:0.65:0.16:0:0.14	4430	0	0	0	0	856	0	2310	0	1970	1300	145	395	977	1160	0	0	0	0	0	207	0	0	146	0	0	423	0	0	0	0	550	0	0	0
Q(-17.03)VKMKPKITRPPINVKII	696.095	0.03	5.43	6.1	11.33		Pyro-glu from Q	37.3529	2765.61	0.0135062	0.0255486	0:0:2.53:0:8.73:0:4.31:0:0:1.00:8.15:2.15:0:0.97:0.66:0:0.06:0:0:0:0:0:0:0:0:0:0:0.20:0:0:0.16:0:0:0:0:0.94:1.08:1.09:0.51:0:3.26:0.04:4.90:0:0:1.32	0	0	4420	0	15200	0	7520	0	0	1750	14200	3750	0	1690	1150	0	101	0	0	0	0	0	0	0	0	0	0	348	0	0	287	0	0	0	0
PNTAR	558.287	0.34	60	3.5	10.18			1001.18	307.222	3.2588	0.0254247	0:1.00:0:0:0:0:0:0:0:0:0:0:0:0:0.47:0.37:0:0:0.55:0:0:0:0.68:0:0.41:0:0.40:0.37:0.59:0.60:0:0:0.36:0.78:0.91:0.57:1.74:1.02:1.48:1.86:1.05:2.82:1.58:0.62:0.74:0.77	0	3010	0	0	0	0	0	0	0	0	0	0	0	0	1410	1110	0	0	1650	0	0	0	2050	0	1240	0	1200	1110	1780	1820	0	0	1080	2350	2740
STQ(+.98)AQSVPVIN(+.98)SMGSSLTTLQPVQ(+.98)FSQP	587.894	0.02	60	5.1	5.24		Deamidation (NQ)	2040	103.333	19.7419	0.0249039	0:0:0:0:0:0:0:0:0:0:0:0:0:0:0:0:1.00:0:0:0:3.58:0:3.97:5.39:0:0:0:0:0:0:0:1.79:0:3.94:0:0:0:0:0:0:0:0:0:0:0:0	0	0	0	0	0	0	0	0	0	0	0	0	0	0	0	0	1860	0	0	0	6660	0	7380	10000	0	0	0	0	0	0	0	3320	0	7320	0
QSSGFSQ(+.98)HKSSSGQ(+.98)SSGYSQ(+.98)HGSGSGHSSGYGQHGSRSGQ	795.129	0.04	60	10	9.7		Deamidation (NQ)	332.941	2371.67	0.140383	0.0247076	1.00:0.87:0.96:0:0:0:0:0:0.49:0:0:0:0:0.18:0:0.68:0:0.53:0:0:0:0:0.29:0:0:0:0:0:0:0:0:0.33:0:0:0:0:0:0:0:0:0:0:0:0:0:0	9090	7910	8680	0	0	0	0	0	4460	0	0	0	0	1640	0	6140	0	4770	0	0	0	0	2680	0	0	0	0	0	0	0	0	2980	0	0	0
PPLPGAGILPLPPLPGAGIPPPPP	1116.68	0.01	60	6.1	5.96			507.706	44.7222	11.3524	0.0241474	0:0:0:0:0:1.00:0:0:0:0:0:0:0:0:0:0:0:0:1.07:2.48:0:0:0:0:0.72:1.77:1.64:0:0:0:0:0:3.05:0:0:0:0:0:0:1.87:0:0:0:0:0:0	0	0	0	0	0	805	0	0	0	0	0	0	0	0	0	0	0	0	865	2000	0	0	0	0	576	1420	1320	0	0	0	0	0	2450	0	0
SGITGIVTKPIKGAQKGG	856.523	0.26	4.41	5.4	10.3			3093.29	7821.56	0.395483	0.0239154	0.07:0.33:0:0.16:0.07:0.01:0:0.33:0.44:1.00:0.49:0.31:0.14:0.06:0.13:0.28:0.34:0.23:0:0.04:0.07:0.04:0.12:0.14:0.19:0:0.13:0.31:0.08:0.01:0.04:0.23:0.07:0.04:0.13:0.23:0.14:0.16:0.39:0.04:0.08:0.09:0.33:0.21:0.28:0.22	2110	10600	0	5240	2400	268	0	10500	14000	32100	15700	10000	4490	1770	4320	9050	10900	7340	0	1360	2100	1350	3770	4610	5980	0	4170	10000	2620	186	1190	7460	2340	1370	4080
TLLPPALRALR	610.895	0.09	60	5.2	12	sp|A6NKX4|S22AV_HUMAN		1295.29	351.111	3.68913	0.0238602	0:0:0:0:0:1.00:0:0:0:0:0:0:0:0:3.78:0:0:0:1.93:2.60:0:1.10:1.69:0:0:0.77:0:0.81:1.10:1.99:1.36:0:1.34:2.00:0:0:0:0:0:0:0:0:0:0:0:0	0	0	0	0	0	1320	0	0	0	0	0	0	0	0	5000	0	0	0	2550	3430	0	1450	2230	0	0	1010	0	1060	1460	2630	1790	0	1770	2640	0
QQGGNCIYTDS	593.237	0.07	60	3.5	3.8			82.1765	789.5	0.104087	0.0236639	1.00:3.66:0:1.18:0:0:0:0:3.27:0:0:2.25:0:1.88:0:0.49:0.42:0:0:0:0:0:0:0:0:0:1.01:0:0:0:0:0.39:0:0:0:0:0:0:0:0:0:0:0:0:0:0	1000	3680	0	1190	0	0	0	0	3280	0	0	2260	0	1890	0	490	421	0	0	0	0	0	0	0	0	0	1010	0	0	0	0	387	0	0	0
DASQLLHQAEVAQQ	769.39	0.04	60	3.9	4.35	sp|Q9UPN3|MACF1_HUMAN		758.824	5167.22	0.146853	0.023403	0:0:1.00:0.98:0:0.74:0.41:0:1.11:0:0:1.05:0:0:0:1.06:0:0:0:0:0:0:0:0:0.88:0:0:0:0:0:0:0:0:0:0:0:0:0:0:0:0:0:0:0:0:0	0	0	14700	14300	0	10800	6010	0	16200	0	0	15500	0	0	0	15500	0	0	0	0	0	0	0	0	12900	0	0	0	0	0	0	0	0	0	0
Q(-17.03)TEEGEEN(+.98)PFIC	690.27	0.12	60	7.9	3.58		Pyro-glu from Q; Deamidation (NQ)	175.212	1365.38	0.128325	0.0231641	1.00:1.51:0.49:0.10:0.03:0.20:0.07:0.71:0:0:2.38:0.61:0:0:0:0:0.81:0:0:0.02:0:0.06:0:0:0.31:0:0:0.05:0:0:0:0.26:0.14:0:0.10:0:0:0:0:0:0:0:0:0:0:0	3110	4690	1520	310	90.8	615	221	2200	0	0	7410	1900	0	0	0	0	2510	0	0	71.6	0	193	0	0	975	0	0	167	0	0	0	800	447	0	325
AVSLGQVVIT	986.593	0.13	3.88	6.9	5.57			2020.18	680.056	2.97061	0.0229989	0.98:0:1.04:0:0:11.38:0:0.62:1.47:1.00:7.69:1.49:2.86:0:0:0:2.02:0:3.75:5.07:1.48:3.82:8.50:2.03:17.87:5.77:16.46:1.29:3.02:1.30:6.44:2.59:4.67:0:1.61:5.83:13.69:0:4.97:3.17:0:0:0:0.87:0.25:0	392	0	416	0	0	4560	0	250	588	401	3080	596	1150	0	0	0	808	0	1500	2030	593	1530	3410	815	7170	2310	6600	516	1210	523	2580	1040	1870	0	646
APPLALIQAPVPPSAPTLVLAPVPTPV	876.185	0.07	2.94	9.4	5.57			3899.88	1393.33	2.79896	0.0224743	0.38:0:0:1.50:0:0.67:0.74:0.63:0.28:1.00:0:0.48:0.48:4.68:0.92:1.83:0.18:0:4.16:4.51:4.02:8.17:1.20:2.11:3.67:0:0.55:2.41:0.95:0.62:0.51:0.30:1.81:0.24:1.19:0.40:0:0:3.69:1.30:0.79:0:2.55:1.70:0:0	696	0	0	2730	0	1220	1350	1150	506	1820	0	880	870	8510	1680	3340	328	0	7560	8200	7320	14900	2180	3840	6670	0	1010	4390	1730	1130	929	547	3300	432	2160
GRPGPCADVN	493.232	0.09	5.81	7	5.83			21	157.389	0.133427	0.0224093	0:2.35:0:0:0:0:0:1.37:2.53:1.00:1.74:1.39:0:0:1.32:0:0:0:0:0:0:0:1.47:0:0:0:0:0:0:0:0:0:0:0:0:0:0:0.84:1.56:1.65:1.80:0:1.25:0:0.62:0	0	569	0	0	0	0	0	331	613	242	421	338	0	0	319	0	0	0	0	0	0	0	357	0	0	0	0	0	0	0	0	0	0	0	0
QQLQ(+.98)ALNLLVILLPDANRDTLKALLE	972.91	0.01	60	13.2	4.56		Deamidation (NQ)	2070.71	128.556	16.1075	0.0223814	0:1.00:0:3.71:0:0:0:0:0:0:0:0:0:0.56:0:0:0:0:16.12:0:0:2.54:27.18:0.53:1.34:0:15.13:1.09:0:0:6.65:0:1.37:0:8.44:0:0:0:0:0:24.25:0:0:0:0:0	0	438	0	1630	0	0	0	0	0	0	0	0	0	246	0	0	0	0	7060	0	0	1110	11900	233	585	0	6630	475	0	0	2910	0	599	0	3700
SQ(+.98)VVAAASALAA	530.293	0.15	60	3.5	5.24		Deamidation (NQ)	180	866.167	0.207812	0.021975	0:1.00:0.37:0.14:0:0.15:0.13:0:0.45:0:0.30:0.32:0.29:0.39:0.08:0:0:0:0.20:0:0:0.15:0:0:0.36:0:0:0:0:0:0:0:0:0:0:0:0:0:0:0:0:0:0:0:0:0	0	4300	1610	594	0	660	565	0	1950	0	1280	1370	1260	1660	342	0	0	0	867	0	0	633	0	0	1560	0	0	0	0	0	0	0	0	0	0
QQQQQ	659.299	0.03	60	9.9	5.52	sp|Q14686|NCOA6_HUMAN:sp|Q8WXH0|SYNE2_HUMAN:sp|Q09472|EP300_HUMAN:sp|Q13255|GRM1_HUMAN:sp|Q9ULL8|SHRM4_HUMAN		0	1295.78	0	0.0214537	9.96:26.24:20.48:18.93:0:18.71:0:0:0:1.00:0:0:0:0:0:0:0:0.62:0:0:0:0:0:0:0:0:0:0:0:0:0:0:0:0:0:0:0:0:0:0:0:0:0:0:0:0	2420	6380	4980	4600	0	4550	0	0	0	243	0	0	0	0	0	0	0	151	0	0	0	0	0	0	0	0	0	0	0	0	0	0	0	0	0
KGPEEASSEVQ(+.98)DTNEVHVPGDQDEPQTLG	774.09	0.05	60	8.5	3.89		Deamidation (NQ)	630.588	1956.33	0.322332	0.0211511	1.00:1.48:1.08:0.49:0:0.87:0:0:0.32:0:0:0:1.23:0:0.28:0.52:1.15:1.57:0.80:0.47:0:0.45:0:0:0.75:0:0:0:0:0:0:0:0.57:0:0:0:0:0:0:0:0:0:0:0:0:0	3520	5230	3790	1740	0	3060	0	0	1140	0	0	0	4350	0	984	1820	4060	5520	2820	1670	0	1590	0	0	2630	0	0	0	0	0	0	0	2010	0	0
PGPPGEN(+.98)GFPGQMGIR	806.357	0.06	60	3	6.43		Deamidation (NQ)	0	1450.56	0	0.0211505	1.00:1.14:1.03:0.77:0:0:0:0:1.41:0:0:0:0:0:0:0:0:0:0:0:0:0:0:0:0:0:0:0:0:0:0:0:0:0:0:0:0:0:0:0:0:0:0:0:0:0	4880	5560	5040	3760	0	0	0	0	6870	0	0	0	0	0	0	0	0	0	0	0	0	0	0	0	0	0	0	0	0	0	0	0	0	0	0
E(-18.01)QGDDGD	717.231	0.07	60	5.2	3.37		Pyro-glu from E	53.6471	410.611	0.130652	0.0210912	1.00:0:1.61:4.26:0:0:0:2.46:0:0:0:4.51:0:8.56:0:2.87:3.14:10.08:0:0:0:0:0:0:3.11:0:0:0:0:0:0:0:1.64:0:0:0:0:0:0:0:0:0:0:0:0:0	192	0	308	817	0	0	0	472	0	0	0	867	0	1640	0	552	603	1940	0	0	0	0	0	0	597	0	0	0	0	0	0	0	315	0	0
KQWRKNLWIFVSKF	940.562	0.03	60	9.5	11.26			7177.06	1399.44	5.12851	0.0210312	0:8.38:0:0.87:0:6.64:0:0:0:1.00:0:0:0:0:0:0:0:0:0:0:5.23:10.86:10.48:7.13:0:9.97:0:2.10:0:22.89:0:0:4.40:8.72:0:4.84:0:0:0.23:0:7.13:0.99:0.16:3.98:23.12:0	0	12500	0	1290	0	9910	0	0	0	1490	0	0	0	0	0	0	0	0	0	0	7810	16200	15600	10600	0	14900	0	3140	0	34200	0	0	6560	13000	0
SSGGGSGGGYGN(+.98)Q(+.98)DQS	708.751	0.15	60	5.8	3.8		Deamidation (NQ)	2142.94	5092.22	0.420826	0.0208859	1.00:0.84:0.34:0.20:0.38:0.27:0.66:0.71:0:0:3.15:1.06:2.56:1.29:0.51:0.78:2.13:2.23:1.04:0:0.63:0.24:0:0:0:0.98:0.65:0.52:0.35:0.49:0.56:0:0.21:1.11:0.42:0:0:0:0:0:0:0:0:0:0:0	5060	4240	1720	1030	1940	1360	3340	3600	0	0	15900	5390	12900	6530	2590	3960	10800	11300	5240	0	3190	1210	0	0	0	4970	3310	2620	1760	2470	2850	0	1060	5620	2130
DFLAEGGGV	864.408	0.27	60	5.5	3.67	sp|P02671|FIBA_HUMAN		153447	464600	0.330278	0.0207741	1.00:0.63:0.20:0.15:0.21:0.11:0.36:0.46:0.36:0:2.02:0.50:1.30:0.21:0.11:0.13:0.75:2.32:0.59:0.13:0.05:0.23:0.07:0.12:0.19:0.02:0.03:0.20:0.07:0.21:0.15:0.49:0.24:0.31:0.28:0:0:0:0:0:0:0:0:0:0:0	773000	486000	156000	116000	161000	82900	282000	356000	281000	0	1560000	384000	1000000	162000	84700	99200	579000	1800000	455000	97900	42400	181000	54000	89600	147000	16200	21600	153000	57900	161000	112000	382000	183000	237000	218000
RGIRGLHGL	978.589	0.24	4.81	7.5	12			1520.94	713.944	2.13034	0.0201616	0.31:0.38:0.81:0.61:0:0:0.76:0.97:2.95:1.00:0.77:0.71:0.17:0.43:1.50:0.21:2.23:0.82:1.52:2.18:0.63:1.55:1.59:0.61:5.89:0:0.91:2.98:1.95:1.30:3.42:0.47:2.22:1.17:1.03:0.10:1.82:0:0.98:2.74:0.37:1.61:2.06:0.77:0.58:0	273	331	713	540	0	0	664	850	2590	879	674	623	153	378	1320	184	1960	719	1340	1920	549	1360	1400	537	5170	0	799	2620	1710	1140	3010	415	1950	1030	906
SSETF	570.246	0.44	17.9	5.2	4			17893.2	43135.6	0.414814	0.0200033	1.00:1.39:0.87:0.79:0:0.32:0.06:0.90:1.89:0:0.54:1.12:0:1.91:0.64:0.39:0.69:0.06:0:0.03:0:0.01:0.06:0:0.07:0.68:0.63:0.25:0.27:0.18:0.29:1.04:0:0.88:0.55:0:0:0:0.01:0:0:0.01:0:0:0:0	61700	85800	53800	48900	0	19900	3960	55800	116000	0	33400	69300	0	118000	39500	24200	42500	3680	0	1770	0	395	3660	0	4360	41800	38900	15300	16500	11200	18000	64100	0	54100	34100
RKLPAPGADV	1023.61	0.1	6.61	9.2	8.75			715.047	186.022	3.84388	0.0187665	0.81:0:0.67:0.35:0.65:3.08:3.29:0:2.29:1.00:0:0:0:0:0:0:0:0.34:2.59:0.19:1.52:1.17:6.36:0:1.37:2.03:0.92:1.90:9.19:6.59:0.18:0:1.69:0:9.67:0.39:6.66:0:4.06:2.60:0:0:4.16:1.21:0.26:0	218	0	180	93.4	175	827	881	0	614	268	0	0	0	0	0	0	0	92	694	49.7	408	314	1700	0	368	545	246	509	2460	1770	48.1	0	454	0	2590
KDTWVEHWPEEDECQ(+.98)DEEN(+.98)QKQ(+.98)CQ	759.783	0.02	60	5.8	4.05	sp|P01024|CO3_HUMAN	Deamidation (NQ)	56.8235	588.611	0.0965383	0.0182672	1.84:1.38:0:0:0.53:0:0:0:0:1.00:0:1.07:0:0:0.64:0:0:0.84:0:0:0:0:0:0:0:0:0:0:0:0.67:0:0:0:0:0:0:0:0:0:0:0:0:0:0:0:0	2670	2000	0	0	776	0	0	0	0	1450	0	1550	0	0	929	0	0	1220	0	0	0	0	0	0	0	0	0	0	0	966	0	0	0	0	0
SQ(+.98)GMDSKPWYCDK	773.311	0.05	60	6.2	5.68		Deamidation (NQ)	88.4765	19.9778	4.42874	0.018206	0:1.00:0:2.37:0:0:0:0:0:0:0:0:0:0.69:0:0:0:0:0:1.95:1.07:0.96:4.34:0:0:0.68:2.08:0:1.25:0.57:0.47:0:1.23:0:2.34:0:0:0:0:0:0:0:28.95:0:0:0	0	88.7	0	210	0	0	0	0	0	0	0	0	0	60.9	0	0	0	0	0	173	95.2	85.6	385	0	0	60.6	185	0	111	50.9	41.8	0	109	0	207
ALAGQAAGLGLVGKRLSLARNVLIALA	872.869	0.15	2.83	5.4	12.01			5457.65	12548.7	0.434918	0.017617	0.16:0.21:0.36:0:1.00:0.90:0.29:0.61:0.77:1.00:0.79:0:0:0.50:0.03:0.40:0.65:0.15:0:0:0.42:0.21:0.32:0:0:0.23:0.55:0.51:0.07:0.33:0.42:0.14:0:0:0:0.28:0.19:0.07:0:0.12:0:0.03:0.37:0.53:0:0.02	4600	5940	10500	0	28800	26100	8430	17700	22200	28900	22700	0	0	14400	856	11600	18700	4450	0	0	12100	5980	9320	0	0	6730	15800	14800	1980	9680	12200	4190	0	0	0
N(+.98)DCSQ(+.98)HGVCQDGV	682.237	0.04	60	7.8	4.2	sp|P22105|TENX_HUMAN	Deamidation (NQ)	61.1765	5962.22	0.0102607	0.0175697	1.00:4.67:0:3.72:0:0:1.25:0:0:0:14.09:4.18:16.19:3.28:0:0:9.75:29.68:0:0:0:0:0:0:0:0:0:0:0:0.85:0:0:0:0:0:0:0:0:0:0:0:0:0:0:0:0	1220	5710	0	4540	0	0	1530	0	0	0	17200	5110	19800	4010	0	0	11900	36300	0	0	0	0	0	0	0	0	0	0	0	1040	0	0	0	0	0
EVLSPTVKGKL	1170.71	0.02	60	7.9	8.69			183.647	17.9444	10.2342	0.0172881	0:0:0:0:0:1.00:0:0:0:0:0:0:0:0:0:0:0:0:2.79:0.56:0:0:0:0.32:0:1.46:0.83:0:0:0:2.04:0.94:0.71:0:0:0:0:0:0:0:0:0:0:0.66:0:0	0	0	0	0	0	323	0	0	0	0	0	0	0	0	0	0	0	0	903	181	0	0	0	103	0	472	268	0	0	0	661	303	231	0	0
TATSEYQTFFNPR	521.247	0.3	60	3.9	5.66			18855.3	41227.8	0.457344	0.0171436	1.00:0.56:0.63:0.84:0.21:0.47:0.20:0.24:1.27:0:0.56:1.98:0.60:0.17:0.19:0.35:0.56:0.66:0.31:0.12:0.09:0.79:0:0:0.33:0.21:0.14:0.27:0.14:0.67:0.08:0.48:0.44:0.17:0.30:0:0:0:0:0:0:0:0:0:0:0	70500	39700	44600	59500	15100	32900	14100	17300	89700	0	39500	140000	42700	12200	13600	24900	39400	46400	21700	8640	6580	55900	0	0	23100	14700	10000	19300	9900	47400	5620	33600	30800	12300	21000
YEMYRNLAQ(+.98)GRNV	807.891	0.03	60	4.6	8.59		Deamidation (NQ)	0	1162.06	0	0.0167537	0:0:1.00:0.46:0:0.20:0:0:0.95:0:0:0.09:0.62:0:0:1.23:0:0:0:0:0:0:0:0:0:0:0:0:0:0:0:0:0:0:0:0:0:0:0:0:0:0:0:0:0:0	0	0	4590	2110	0	941	0	0	4370	0	0	406	2860	0	0	5640	0	0	0	0	0	0	0	0	0	0	0	0	0	0	0	0	0	0	0
TDVLDSLTTIPEL	708.872	0.06	60	3	3.49			183.353	0	#DIV/0!	0.0165487	0:0:0:0:0:0:0:0:0:0:0:0:0:0:0:0:0:0:0:0:0:0:0:0:0:0:0:1.00:1.10:1.51:0:0:0.62:0:1.38:0:0:0:0:0:0:0:0:0:0:0	0	0	0	0	0	0	0	0	0	0	0	0	0	0	0	0	0	0	0	0	0	0	0	0	0	0	0	557	611	839	0	0	344	0	766
LLTLVLSLLPPQ	653.929	0.15	60	4.7	5.52			3112.94	844.444	3.68638	0.0164313	0:0:0:0:1.00:0:1.77:0:0:0:0:0:0:0:0:1.49:1.37:0:2.17:4.39:0:0:0:1.58:1.00:1.88:2.23:0:0:0:1.07:1.01:1.56:0:2.70:0:0:0:0:0:0:0:0:0:0:0	0	0	0	0	2700	0	4780	0	0	0	0	0	0	0	0	4020	3700	0	5860	11900	0	0	0	4260	2700	5080	6010	0	0	0	2880	2730	4220	0	7280
E(-18.01)SN(+.98)GGGGG	617.208	0.16	60	7	4		Pyro-glu from E; Deamidation (NQ)	1107.65	119.333	9.28196	0.0161674	0:0:0:0:0:0:0:0:0:0:1.00:1.15:0:0:0:0:0:0:0:0:0:0:0:0:1.58:0:0:1.18:2.37:3.82:1.68:0:0:3.08:5.14:0:1.79:0:2.43:0.02:0:1.94:5.27:0:0.15:0	0	0	0	0	0	0	0	0	0	0	998	1150	0	0	0	0	0	0	0	0	0	0	0	0	1580	0	0	1180	2370	3810	1680	0	0	3080	5130
M(+15.99)ENIKKAGFQ	591.313	0.04	60	7.1	8.35		Oxidation (M)	715.882	0	#DIV/0!	0.0161026	0:0:0:0:0:0:0:0:0:0:0:0:0:0:0:0:0:0:0:0:1.00:0:1.37:1.32:0:0:0:0:1.14:0:0:0:0.57:0:0:0:0:0:0:0:0:0:0:0:0:0	0	0	0	0	0	0	0	0	0	0	0	0	0	0	0	0	0	0	0	0	2250	0	3080	2970	0	0	0	0	2580	0	0	0	1290	0	0
CSPDTGSC	385.127	0.1	60	2.6	3.8			538.588	35.9444	14.9839	0.0160749	0:0:0:0:0:0:0:0:0:0:0:0:1.00:0:0:0:0:0:0:1.15:0:3.48:0:0:2.15:0:0:3.39:2.46:0:0:0:0:1.54:0:0:0:0:0:0:0:0:0:0:0:0	0	0	0	0	0	0	0	0	0	0	0	0	647	0	0	0	0	0	0	742	0	2250	0	0	1390	0	0	2190	1590	0	0	0	0	994	0
AIPAILIGAIGAS	583.86	0.12	60	5.6	5.57			2895.88	865.111	3.34741	0.0156697	0:0:1.00:1.90:2.64:0:0:0:0:0:0:0:0:0:1.75:4.53:12.42:0:11.52:8.51:10.69:9.60:4.15:4.93:0:0:0:3.46:11.23:0:3.71:1.82:0:3.56:3.48:0:0:0:0:0:0:0:0:0:0:0	0	0	642	1220	1700	0	0	0	0	0	0	0	0	0	1120	2910	7980	0	7400	5470	6870	6160	2660	3160	0	0	0	2230	7210	0	2380	1170	0	2290	2230
SCQ(+.98)QEM(+15.99)M(+15.99)DV	552.182	0.28	60	3.5	3.67		Deamidation (NQ); Oxidation (M)	759.029	4506.94	0.168413	0.0153769	1.00:1.58:0.27:0.24:0.45:0.15:0.13:0.85:0.34:0:4.36:0:2.11:1.01:0:0.29:1.60:4.52:0.88:0:0:0.35:0:0:0.20:0:0:0.02:0.30:0:0:0.63:0.64:0:0:0:0:0:0:0:0:0:0:0:0:0	4290	6790	1160	1050	1930	664	551	3640	1470	0	18700	0	9040	4310	0	1250	6880	19400	3780	0	0	1480	0	0	856	0	0	67.5	1280	0	0	2700	2740	0	0
RLMLTL	746.469	0.02	60	9.5	9.75			0	361.111	0	0.0152651	0:0.28:0:0.52:0:0:0:0:1.69:1.00:1.54:0:0.99:2.55:0:0:0:0:0:0:0:0:0:0:0:0:0:0:0:0:0:0:0:0:0:0:0:0:1.04:0:0:2.60:1.65:0:1.28:3.59	0	210	0	393	0	0	0	0	1290	759	1170	0	748	1930	0	0	0	0	0	0	0	0	0	0	0	0	0	0	0	0	0	0	0	0	0
Q(-17.03)AGAAGSRMNFRPGVL	807.913	0.07	60	5.8	12		Pyro-glu from Q	8797.06	1513.89	5.8109	0.0150528	0:0:0:0:0:0:1.00:0:0:0:0:0:0:1.69:4.32:0:0:0:2.00:0.87:6.00:0:5.58:7.95:0:5.28:5.37:0:0:0:0:0:0:5.42:0:0:0:0:0:0:0:0:0:0:0:0	0	0	0	0	0	0	3890	0	0	0	0	0	0	6560	16800	0	0	0	7770	3380	23300	0	21700	30900	0	20500	20900	0	0	0	0	0	0	21100	0
FLAEGGGVR	453.245	0.12	60	4.7	6	sp|P02671|FIBA_HUMAN		21692.1	54861.1	0.395401	0.0149699	1.00:5.03:1.70:0.66:0.56:1.12:0.65:0.39:3.82:0:2.02:1.14:5.08:0.36:0.81:3.75:1.76:3.79:0.60:0.93:0:2.04:0:0:1.50:0.04:0.03:1.06:0.81:2.12:0.45:0.46:1.92:0.21:0.41:0:0:0:0:0:0:0:0:0:0:0	29400	148000	49900	19400	16400	33000	19000	11500	112000	0	59300	33300	149000	10700	23800	110000	51800	111000	17600	27200	0	59800	0	0	44100	1140	786	31000	23800	62300	13100	13400	56400	6240	11900
GFAGLLAILLV	543.851	0.11	60	8.7	5.52			4077.06	1572.78	2.59227	0.0149454	0:0:0:0:1.00:0:0.60:1.17:0:0:0.45:0:0:0:0:2.22:2.00:0:1.32:0.81:1.51:0.91:1.91:2.89:0:0:0.80:1.03:0:1.32:1.93:0.91:1.27:0:1.62:0:0:0:0:0:0:0:0:0:0:0	0	0	0	0	3800	0	2290	4440	0	0	1730	0	0	0	0	8450	7600	0	5020	3090	5720	3450	7270	11000	0	0	3040	3930	0	5030	7330	3460	4830	0	6140
LHPGVASIRSL	1149.69	0.09	4.39	7.8	9.76			1029.44	274.611	3.7487	0.0144295	2.67:0:3.43:1.40:0.58:0.41:0.81:0:0:1.00:0:0:0:0:2.73:0:0:0:2.78:0.99:1.13:2.57:3.61:0.91:0.05:0:1.82:3.11:3.23:3.42:0.92:6.09:0:2.70:12.82:0:4.69:0:8.54:2.34:0:0:0:4.00:0:0	1010	0	1300	530	221	156	306	0	0	380	0	0	0	0	1040	0	0	0	1050	374	430	974	1370	344	17.4	0	690	1180	1220	1300	351	2310	0	1020	4870
ASNNQ(+.98)HGADSENGDMN(+.98)SS	918.828	0.08	60	10.7	4.02		Deamidation (NQ)	0	434.222	0	0.0143698	1.00:1.24:0:0:0:0:0:0:1.71:0:0.57:0:0.79:0:0:0:0:0.80:0:0:0:0:0:0:0:0:0:0:0:0:0:0:0:0:0:0:0:0:0:0:0:0:0:0:0:0	1280	1580	0	0	0	0	0	0	2190	0	726	0	1010	0	0	0	0	1030	0	0	0	0	0	0	0	0	0	0	0	0	0	0	0	0	0
PPPGA	438.232	0.06	60	8.2	5.96			3580.59	170.556	20.9937	0.0142793	0:0:1.00:0:0:0:0:0:0:0:0:0:0:0:0:0:0:0:0:3.37:2.31:0:4.45:4.90:0:0:0:1.11:0:0:0:0:0:3.72:0:0:0:0.27:0:0:0.24:0.41:0.05:0:0:0.15	0	0	3070	0	0	0	0	0	0	0	0	0	0	0	0	0	0	0	0	10300	7080	0	13700	15000	0	0	0	3390	0	0	0	0	0	11400	0
LSKKRKFPK	566.375	0.09	60	4	11.33			916.471	240.389	3.81245	0.0139338	1.00:0:0:0:1.89:0:0:0:0:0:0:0:0:3.11:0:1.92:0:0:4.47:0:4.01:0:4.62:2.87:0:0:0:2.14:0:3.58:0:0:2.18:2.59:2.02:0:0:0:0:0:0:0:0:0:0:0	547	0	0	0	1030	0	0	0	0	0	0	0	0	1700	0	1050	0	0	2450	0	2190	0	2530	1570	0	0	0	1170	0	1960	0	0	1190	1420	1100
CYNGM(+15.99)CQ	834.246	0.03	60	8.8	5.51		Oxidation (M)	25.3529	681.667	0.0371926	0.0136277	1.00:0:0:0:0.65:0.20:0:0:0:0:0:0:0.46:0.76:0.33:0.37:0:0:0:0:0:0.13:0:0:0:0:0:0:0:0:0:0:0:0:0:0:0:0:0:0:0:0:0:0:0:0	3250	0	0	0	2130	640	0	0	0	0	0	0	1490	2480	1090	1190	0	0	0	0	0	431	0	0	0	0	0	0	0	0	0	0	0	0	0
YEGSYALTSEEAERSDGDPVQPAVLQVHQTS	1121.86	0.12	60	8	4.08			14097.1	6057.78	2.3271	0.0124734	1.00:0:0:0.84:1.25:0:2.51:1.36:0:0:0:0.49:1.06:2.42:2.07:1.43:1.99:0:3.22:2.19:2.13:0:0:1.70:0:3.54:6.90:2.94:2.53:3.61:1.08:1.37:1.80:0.70:2.35:0:0:0:0:0:0:0:0:0:0:0	6640	0	0	5560	8300	0	16700	9020	0	0	0	3290	7010	16100	13700	9520	13200	0	21400	14600	14200	0	0	11300	0	23500	45800	19500	16800	24000	7170	9120	12000	4660	15600
NGAYT	525.23	0.06	60	7.8	5.52			22.3529	790.389	0.0282809	0.0124667	1.00:1.30:0.77:0:0:0:0:1.37:0:0:0.70:0.29:0:0:0:0:0:1.96:0:0.20:0:0:0:0:0:0:0:0:0:0:0:0:0:0:0:0:0:0:0:0:0:0:0:0:0:0	1920	2510	1490	0	0	0	0	2630	0	0	1350	557	0	0	0	0	0	3770	0	380	0	0	0	0	0	0	0	0	0	0	0	0	0	0	0
SYALTSEEAERSDGDPVQPAVLQVHQTS	1005.48	0.08	60	6.4	4.17			7245.88	3093.89	2.342	0.0123501	0:0:0:0:1.00:0:1.76:1.97:0:0:1.95:0:2.86:3.04:3.22:2.02:4.48:0:1.85:0.85:7.73:0:4.02:3.79:0:1.61:4.16:1.66:1.27:6.24:1.88:3.03:1.81:3.55:5.88:0:0:0:0:0:0:0:0:0:0:0	0	0	0	0	2500	0	4390	4910	0	0	4870	0	7140	7600	8040	5040	11200	0	4620	2120	19300	0	10000	9460	0	4030	10400	4140	3170	15600	4690	7560	4520	8870	14700
GEGDFLAEGGGV	554.25	0.3	60	2.6	3.57	sp|P02671|FIBA_HUMAN		155388	333611	0.465777	0.0122756	1.00:0.92:0.54:1.00:0.88:0.58:0.65:0.69:0.67:0:3.61:2.45:1.98:0.89:0.40:0.74:1.66:2.18:1.57:0.31:0.19:0.48:0.16:0.26:0.67:0.13:0.22:0.83:0.20:0.86:0.58:0.90:0.76:0.69:0.35:0:0:0:0:0:0:0:0:0:0:0	288000	265000	156000	289000	253000	167000	187000	198000	192000	0	1040000	706000	570000	258000	115000	214000	479000	628000	453000	90700	55500	138000	45300	75900	193000	38300	62800	239000	57400	248000	167000	260000	219000	199000	99700
DGLTMN(+.98)YCRN(+.98)PDADTGPWCFTMDPSIRWEYCN(+.98)LTRCSDTEGT	968.391	0.24	60	8.6	4.09		Deamidation (NQ)	13520	4609.44	2.93311	0.0122437	1.00:0:0:1.80:0.31:0:0.27:0:0.95:0:0:1.02:0:0:0.28:0:0.61:0.43:0.70:0.63:2.11:0:0.43:2.75:0.92:1.68:2.09:0.11:0.80:0.36:0:1.57:0:3.39:0.97:0:0:0:0:0:0:0:0:0:0:0	12400	0	0	22400	3850	0	3290	0	11900	0	0	12700	0	0	3440	0	7610	5380	8740	7880	26100	0	5320	34100	11400	20900	25900	1420	9910	4470	0	19500	0	42100	12100
AFKVPAPK	429.27	0.09	60	5.7	10			1029.53	163.889	6.28187	0.0119659	0:0:0:0:1.00:0:0.75:0:0:0:0:0:0:0:0:0:0:0:1.27:0:1.37:0:1.74:2.30:0:0:0:0.39:0.89:1.16:0:0:1.25:0:0:0:0:0:0:0:0:0:0:0:0:0	0	0	0	0	1690	0	1260	0	0	0	0	0	0	0	0	0	0	0	2140	0	2310	0	2940	3880	0	0	0	652	1510	1960	0	0	2110	0	0
LKKALLLQ(+.98)GSN	593.377	0.15	7.27	5.3	10		Deamidation (NQ)	5412.94	2067.22	2.61846	0.0119242	1.00:0:0:0:6.01:0:2.46:4.18:0:0:0:0:4.49:0:10.48:5.81:0:0:12.12:7.94:0:0:9.34:11.21:5.22:3.00:2.55:4.93:4.41:2.02:4.98:2.35:6.63:0:8.38:0:0:0:0:0:0:0:0:1.43:0.92:0.32	1080	0	0	0	6510	0	2660	4530	0	0	0	0	4850	0	11300	6280	0	0	13100	8590	0	0	10100	12100	5650	3250	2760	5340	4770	2190	5390	2540	7170	0	9070
Q(-17.03)GKSKRRFL	1102.66	0.13	4.33	7.4	12.02		Pyro-glu from Q	1110.49	331.444	3.35045	0.0118912	0:0:0:1.93:0:0:1.59:0:0:1.00:0:0.88:3.48:0:2.47:0.58:0.60:0:4.52:0.68:4.56:5.93:0.45:3.03:0.91:0.94:0.29:0.44:8.10:0.55:0.19:3.56:0.25:1.53:3.75:1.25:2.94:0:0.94:5.42:0:0:0:2.12:0:0	0	0	0	917	0	0	759	0	0	476	0	421	1660	0	1170	276	287	0	2150	322	2170	2820	214	1440	435	445	136	208	3860	260	88.3	1700	120	730	1780
KKVVSSK	388.253	0.05	60	5.1	10.3			2130.71	484.444	4.39825	0.0118631	0:0:0:0:0:0:1.00:0:0:0:0:0:0:1.33:0:0:0.72:0:0:0:0:0.64:0.13:1.39:0.75:2.88:1.70:0.79:0:0:1.27:0.66:0:1.65:0.81:0:0:0:0:0:0:0:0:0:0:0	0	0	0	0	0	0	2860	0	0	0	0	0	0	3800	0	0	2060	0	0	0	0	1830	362	3970	2140	8230	4870	2260	0	0	3620	1900	0	4720	2320
NGFKSHALQLNNRQIR	474.763	0.3	10.46	1.8	12.01			3016.47	11870.6	0.254114	0.0115161	1.00:1.41:0.83:0.38:0.14:0.64:0.57:0:0.29:0:0:0:0.76:0:0.17:0.10:0.17:0.34:0.54:0.13:0:0.23:0:0:0:0:0:0.11:0.09:0:0.06:0:0.15:0.32:0:14.35:4.94:4.35:15.76:3.88:4.69:10.64:2.80:1.12:8.22:4.43	31400	44200	26000	11800	4460	20100	18000	0	9140	0	0	0	23900	0	5420	3240	5210	10800	17100	3960	0	7150	0	0	0	0	0	3410	2930	0	1810	0	4720	10200	0
SHNN(+.98)DCIDVDECA	718.248	0.05	60	5.9	3.84		Deamidation (NQ)	0	2202.78	0	0.0113995	1.00:3.19:0:0:0:0:0:2.64:2.84:0:6.76:1.33:1.55:0:0:0:0:1.63:0:0:0:0:0:0:0:0:0:0:0:0:0:0:0:0:0:0:0:0:0:0:0:0:0:0:0:0	1890	6040	0	0	0	0	0	5000	5370	0	12800	2530	2930	0	0	0	0	3090	0	0	0	0	0	0	0	0	0	0	0	0	0	0	0	0	0
KITHRIHWESASLL	564.31	0.03	60	4.5	8.76	sp|P01024|CO3_HUMAN		762.294	60.3389	12.6335	0.0113763	0:0:0:1.00:0:0:0.76:0.06:0:0:0:0:0:0:0:0:0:0:0:5.09:4.39:0:1.97:4.42:0:2.91:0:0:0:0:0.99:1.93:0:0:0:0:0:0:0:0:0:0:0:0:0:0	0	0	0	597	0	0	451	38.1	0	0	0	0	0	0	0	0	0	0	0	3040	2620	0	1180	2640	0	1740	0	0	0	0	589	1150	0	0	0
LVEGEIAEEAAEKATS	823.905	0.04	60	3.4	3.98			1760.59	225	7.82484	0.010907	0:0:0:0:0:0:0:0:0:0:0:0:1.00:0:1.37:0:0:0:0:0:1.91:0:0:0:0:2.15:3.44:1.48:0.85:2.71:0.93:0:0:0:4.01:0:0:0:0:0:0:0:0:0:0:0	0	0	0	0	0	0	0	0	0	0	0	0	1710	0	2340	0	0	0	0	0	3270	0	0	0	0	3680	5890	2530	1460	4650	1590	0	0	0	6860
LGQKVCRPVVLKPIPTKPAV	1072.16	0.19	2.43	6.2	10.32			1801.12	4849.44	0.371407	0.0107961	1.87:1.18:0.67:0.21:0.72:0.83:0.44:0:1.20:1.00:0.44:0:0.51:0.37:0.08:0.33:2.05:0.37:0.06:0:0.16:0.38:0.12:0.31:0.95:0:0:0.86:0.38:0:0.22:0:0.20:0.49:0.18:0:0.45:0:0:1.65:0.19:1.49:1.38:0.59:1.27:0	13300	8390	4750	1490	5140	5880	3140	0	8530	7120	3160	0	3620	2650	570	2320	14600	2630	401	0	1130	2700	858	2180	6800	0	0	6120	2710	0	1580	0	1400	3470	1270
PATLARSLPRLLVQ(+.98)ALQA	960.086	0.06	5.7	6.3	12		Deamidation (NQ)	212.059	3619.87	0.0585819	0.00989352	0.42:0.16:16.84:7.01:23.36:4.30:0:0:6.85:1.00:0:9.06:1.65:31.23:0:29.46:2.60:0:0:0.73:0.50:1.07:0.40:0.62:0:0.66:0:0:1.66:0:0:0:0:1.76:0:18.53:0:0:4.70:0:0:0:11.94:1.13:1.84:0	204	75.6	8190	3410	11400	2090	0	0	3330	487	0	4410	801	15200	0	14300	1260	0	0	357	244	520	193	302	0	322	0	0	810	0	0	0	0	857	0
GKSSSYSKQFTSSTSYNRGDSTFESKSYKMADEAGSEADHEGTHST	994.839	0.03	60	3	5.46	sp|P02671|FIBA_HUMAN		1092.35	0	#DIV/0!	0.00984123	0:0:0:0:0:0:0:0:0:0:0:0:0:0:0:0:0:0:1.00:0:1.27:0:0:1.12:0:0.54:0.32:0:0:0:0:0:0:1.18:0:0:0:0:0:0:0:0:0:0:0:0	0	0	0	0	0	0	0	0	0	0	0	0	0	0	0	0	0	0	3420	0	4340	0	0	3830	0	1860	1080	0	0	0	0	0	0	4040	0
SSKITHRIHWESASLL	467.006	0.27	60	3.3	8.51	sp|P01024|CO3_HUMAN		6858.82	2136.67	3.21006	0.00947942	1.00:2.59:0.78:1.65:0.66:1.01:1.77:0:0:0:0:0:0:0:1.07:3.25:0:0:0:3.64:7.45:0:4.25:3.99:0:7.72:0:1.65:2.40:2.34:1.70:1.47:0:2.82:2.35:0:0:0:0:0:0:0:0:0:0:0	2790	7240	2190	4590	1840	2810	4940	0	0	0	0	0	0	0	2990	9070	0	0	0	10200	20800	0	11900	11100	0	21500	0	4610	6700	6530	4750	4090	0	7860	6560
N(+.98)QTILKKGKRENIVNIRKQREKAAILIQ(+.98)AV	869.539	0.03	5.46	7	11.12		Deamidation (NQ)	10.1765	635.611	0.0160105	0.00941162	1.00:0:2.59:9.53:4.45:12.99:0:0:7.08:0:0:8.18:2.58:0:0:18.62:0:0:0:0:0:0:1.02:0:0:0:0:0:0:0:0:0:0:0:0:0:4.84:0:4.29:0:2.59:0:4.42:0:0.48:7.76	171	0	442	1620	759	2220	0	0	1210	0	0	1400	439	0	0	3180	0	0	0	0	0	0	173	0	0	0	0	0	0	0	0	0	0	0	0
KAKPKPPK	447.299	0.09	60	5.3	10.48			1950.47	497.811	3.91809	0.00920327	0:0:1.00:1.38:0.84:0:0.06:0:0:0:0:0.72:0:0:0:1.27:0.85:0:0:2.68:0:0:0:0.86:3.06:2.85:1.97:1.49:2.17:0.95:0:0.50:1.19:0:4.89:0:0:0:0:0:0:0:0:0:0:0	0	0	1470	2020	1230	0	90.6	0	0	0	0	1050	0	0	0	1860	1240	0	0	3930	0	0	0	1270	4490	4170	2890	2190	3180	1390	0	728	1750	0	7170
GGGGSVCGYSGGGSGCGGGSSGGSG	932.839	0.28	60	7.2	5.51			492.235	1116.39	0.440917	0.00919292	1.00:0.63:0.81:1.02:0.41:0:0.66:0.49:0:0:0.58:0.66:1.06:0:0.24:0.51:0.52:1.10:0.55:0:0:0.60:0:0:0.41:0:0:0.34:0.31:0.69:0.38:0.36:0.39:0:0:0:0:0:0:0:0:0:0:0:0:0	2080	1300	1670	2120	859	0	1360	1010	0	0	1200	1370	2200	0	506	1060	1070	2290	1140	0	0	1250	0	0	856	0	0	696	649	1440	795	739	803	0	0
VPPNNSNAAEDDLPTVELQGVVPR	844.431	0.01	60	9.9	3.92			3704.12	352.222	10.5164	0.0086041	0:0:0:0:0:0:0:0:0:0:0:0:0:1.00:0.43:0:0:0:2.36:0:3.87:1.06:2.06:0:0:1.36:1.54:0:0:0:0:0:1.12:0.89:0:0:0:0:0:0:0:0:0:0:0:0	0	0	0	0	0	0	0	0	0	0	0	0	0	4420	1920	0	0	0	10400	0	17100	4670	9090	0	0	6020	6800	0	0	0	0	0	4950	3940	0
EETKENEGFTVTAEGK	590.279	0.11	60	6.6	4.33	sp|P01024|CO3_HUMAN		23645.3	100257	0.235846	0.0084995	1.00:1.78:0.96:0.20:0.67:0.53:0.29:0.25:0.71:0:0.44:0.13:0.10:0.03:0.10:0.17:0.05:0.08:0.25:0.01:0.07:0.05:0.20:0.10:0.07:0.07:0.07:0.08:0.05:0.16:0.13:0.06:0.06:0.06:0.18:0:0:0:0:0:0:0:0:0:0:0	241000	428000	231000	47300	162000	128000	69400	59800	172000	0	107000	32000	24300	7430	23700	40700	12800	18200	59400	2870	17600	11000	48800	23000	15800	16500	15800	19600	13200	39500	31100	14100	14500	15300	43900
DDPDAPLQPVTPLQLFEG	976.481	0.09	60	6.6	3.37			3546.53	480.056	7.38775	0.00845972	1.00:0:0.51:0:0.46:0:2.08:0:0:0:0:0:0:0.95:0:0:0:0.85:0.98:0.89:6.13:0:4.38:8.48:0:7.07:1.74:0.50:0:0:1.87:0.80:0:7.89:0:0:0:0:0:0:0:0:0:0:0:0	1480	0	754	0	677	0	3080	0	0	0	0	0	0	1400	0	0	0	1250	1460	1320	9060	0	6480	12500	0	10500	2580	741	0	0	2770	1180	0	11700	0
Q(-17.03)KSAALIIQK	1082.64	0.06	4.6	10	10		Pyro-glu from Q	241.059	33.0944	7.28397	0.00837673	0:0:0:0.61:0.83:0:0:0:0:1.00:0:0:0:0:0:2.41:0:0:2.90:0.41:3.86:0.32:5.41:2.23:1.16:0:1.42:0:2.45:3.85:0.28:0:0:9.02:0:3.61:2.80:0:0:1.45:0:0:1.66:1.29:0:0	0	0	0	74.7	102	0	0	0	0	123	0	0	0	0	0	296	0	0	357	50.1	475	38.9	666	274	142	0	175	0	301	474	35	0	0	1110	0
LGRITGQKLN(+.98)IPAILRAP	966.585	0.22	2.85	5.2	12.01	sp|O94880|PHF14_HUMAN	Deamidation (NQ)	2941.53	6614.17	0.444732	0.00809627	0:3.09:0.59:2.44:1.34:2.06:0.38:1.34:0:1.00:0.68:0.06:2.50:2.35:1.20:0.92:3.03:1.63:0.67:0.17:1.63:0.24:0.40:0.19:1.23:0.54:0.52:0.18:0.73:0.16:0.24:0.94:0.35:0.66:1.48:0.86:0.39:0:0.55:1.10:0.55:0:0.52:0.55:2.64:0	0	14900	2870	11800	6470	9960	1860	6500	0	4840	3290	285	12100	11400	5800	4480	14600	7900	3230	844	7900	1160	1920	934	5950	2600	2520	883	3540	795	1140	4550	1680	3200	7160
SADTGGDGESCLSQ(+.98)QDGAAGVPETN(+.98)A	1219.99	0.12	60	9.1	3.33		Deamidation (NQ)	59.4118	1267.78	0.0468629	0.00774823	0:1.00:0:0.57:0:0:0:0:0:0:0.63:0.67:0.44:0:0:0:0.67:1.02:0:0:0:0:0:0:0:0:0:0.22:0:0:0:0:0:0:0:0:0:0:0:0:0:0:0:0:0:0	0	4570	0	2580	0	0	0	0	0	0	2900	3060	1990	0	0	0	3060	4660	0	0	0	0	0	0	0	0	0	1010	0	0	0	0	0	0	0
TLKKSLEIKEEKIAALEARL	761.802	0.2	2.36	4.9	8.1			13702.6	34728.9	0.39456	0.00727389	0.61:0.97:0.82:1.13:0.68:0:0.10:0.67:0.73:1.00:0:0.64:0:0.46:0.82:0.87:0.41:0.76:0:0:0:0:1.11:0.99:0:0.18:0:0:0.01:0:0.36:0:0:0.55:0.77:0.79:0.60:1.13:0.13:0.24:0.15:0:0.91:0.50:0:0.81	35600	56900	48200	65900	39600	0	5620	39500	42900	58600	0	37600	0	26700	48100	51100	24200	44600	0	0	0	0	65200	58000	0	10500	0	0	745	0	21000	0	0	32300	45200
N(+.98)N(+.98)ETRPSVQEDSQAFNPDNPYHQ(+.98)QEG	751.827	0.02	60	7.1	4.17		Deamidation (NQ)	89.4118	1632.78	0.0547605	0.00659564	1.00:0.63:0:0.89:0:0.54:0:0:0.69:0:0:0:0:0.98:0:0.31:0:1.55:0:0.34:0:0:0:0:0:0:0:0:0:0:0:0:0:0:0:0:0:0:0:0:0:0:0:0:0:0	4460	2820	0	3970	0	2400	0	0	3060	0	0	0	0	4390	0	1390	0	6900	0	1520	0	0	0	0	0	0	0	0	0	0	0	0	0	0	0
LAALKKALAAAG	549.362	0.03	60	6.2	10			2180	357.778	6.09317	0.00608446	0:0:0:0:0:1.00:0.38:0:0:0:0:0:0:0:0:0.58:0:0:0.80:2.32:0:0.34:0:0.88:0:2.07:1.40:0.75:1.33:0:0.46:0:0.94:0:0:0:0:0:0:0:0:0:0:0:0:0	0	0	0	0	0	3280	1250	0	0	0	0	0	0	0	0	1910	0	0	2620	7600	0	1120	0	2890	0	6800	4600	2470	4360	0	1500	0	3100	0	0
A(+42.01)WLLVAARALLQ(+.98)LL	797.486	0.12	3.29	7	9.79		Acetylation (Protein N-term); Deamidation (NQ)	527.824	2194.81	0.240487	0.00581413	1.00:0:17.87:5.41:0.39:20.30:0:23.63:20.55:0:7.39:11.38:25.72:25.11:6.76:0:0:20.33:0:0:6.55:0:0:4.82:0:2.00:0:2.78:16.09:6.29:0:0.71:2.94:0:0:27.48:4.54:0:0:4.81:4.62:22.64:26.37:2.99:0:43.79	213	0	3800	1150	83.6	4310	0	5020	4370	0	1570	2420	5470	5340	1440	0	0	4320	0	0	1390	0	0	1030	0	426	0	591	3420	1340	0	150	626	0	0
FGALLGLSLYGA	591.33	0.22	60	4.7	5.52			2189.65	738.333	2.96566	0.00562681	0:0:0:0:0:1.00:0.80:0:0:0:0:0:0.43:1.07:0.43:0.78:0:0:1.44:1.51:1.00:0:0.89:1.20:0:0.90:0:0.76:1.55:1.23:0:0.30:0:0.78:1.11:0:0:0:0:0:0:0:0:0:0:0	0	0	0	0	0	2940	2350	0	0	0	0	0	1270	3160	1270	2300	0	0	4220	4450	2930	0	2610	3520	0	2640	0	2250	4570	3600	0	884	0	2300	3250
E(-18.01)YIIQLSKGRLVLKT	581.69	0.15	3.14	2.9	9.7		Pyro-glu from E	5790.59	21457.8	0.26986	0.00517979	0:1.00:1.43:0.73:2.20:1.18:0.09:0:1.46:0:1.07:1.26:0.32:0:1.69:1.12:0:1.04:0:0.18:0:0:0:0:0:1.27:0:0.38:1.36:0:0:0:0.53:0:0:3.02:0:0:1.78:0:2.43:0:0:0:3.60:0	0	26500	38000	19200	58300	31100	2400	0	38700	0	28200	33300	8440	0	44800	29700	0	27600	0	4840	0	0	0	0	0	33500	0	10000	36100	0	0	0	14000	0	0
EGVQKEDIPPADLSDQVPDTESETR	919.095	0.03	4.11	6.2	3.85	sp|P01024|CO3_HUMAN		930.412	4108.56	0.226457	0.00510583	1.00:1.16:0.67:0.38:1.62:0.34:0:0.49:0.48:0:0.26:0:0.10:0:0.50:0.44:0.68:0:0:0:0:0:0.27:0:0:0.55:0:0.36:0.19:0:0.10:0.27:0:0:0:0:0.32:0.16:0:0:0:0:0:0:0.52:0	9130	10600	6080	3500	14700	3110	0	4460	4340	0	2370	0	954	0	4530	4000	6180	0	0	0	0	0	2470	0	0	5000	0	3290	1720	0	887	2450	0	0	0
GNPGLPGEPGPVGG	602.804	0.31	5.46	4.2	4			391.765	1310.39	0.298968	0.00479629	1.60:0.54:1.84:0.78:1.17:0.51:1.19:0.79:2.88:1.00:1.46:1.46:0.68:0:0:0:0.69:0.41:1.24:0:0:0:1.28:0:0:0:0:0:0:0:0:0.76:0:0:1.52:1.40:0.87:1.39:1.48:0:2.24:2.06:1.17:0.52:0:0	2220	750	2560	1080	1620	704	1650	1100	3990	1390	2030	2020	943	0	0	0	961	569	1720	0	0	0	1780	0	0	0	0	0	0	0	0	1050	0	0	2110
PPLVPK	650.43	0.13	60	3.9	9.18			0	1973.33	0	0.0044373	0:1.00:0.26:0:0:0:0:1.03:0:0:0.93:0.54:0:1.06:0:0.19:0:0.71:0:0:0:0:0:0:0:0:0:0:0:0:0:0:0:0:0:0:0:0:0:0:0:0:0:0:0:0	0	6210	1640	0	0	0	0	6390	0	0	5750	3370	0	6570	0	1180	0	4410	0	0	0	0	0	0	0	0	0	0	0	0	0	0	0	0	0
GPRGT	487.266	0.22	7.84	4.5	9.75			16.6471	1325.56	0.0125586	0.00431069	0:0.83:0.32:0:0:0:0:0:0.76:1.00:0.80:0:0.34:0:0.34:0:0.43:0:0:0:0:0:0:0:0:0:0:0:0.06:0:0:0:0:0:0:0.02:0.50:0.58:0.73:0:0.44:0.75:0:0.41:0:0	0	4120	1560	0	0	0	0	0	3780	4960	3960	0	1670	0	1660	0	2150	0	0	0	0	0	0	0	0	0	0	0	283	0	0	0	0	0	0
VGGSY	482.225	0.3	60	3	5.49			60.1765	376.278	0.159926	0.0042675	0.39:0.31:0.91:1.00:0.37:1.53:1.21:0.91:1.21:1.00:0:2.41:0:0:0:0:0:0:0:0:0.31:0:0.24:0:0:0:0:0.24:0.23:0:0:0.21:0:0:0.46:2.17:2.78:2.07:1.50:2.29:1.78:2.07:3.91:0:0.70:0.37	236	184	547	604	223	921	727	549	730	602	0	1450	0	0	0	0	0	0	0	0	189	0	142	0	0	0	0	146	140	0	0	128	0	0	278
GLKQ(+.98)VMAIKSRVVLPYLVPKLTTPPVN(+.98)TRVLA	1168.71	0.05	60	9.4	11.17		Deamidation (NQ)	1393.76	189.374	7.35986	0.00398095	0:0:1.00:0:0:0.00:0:0:0:0:0:0:0:0:0.90:0:0.18:0:0.38:0.66:0.21:1.14:0:1.45:0:2.53:0.25:0.98:0.66:3.61:0.62:0.55:1.14:0:0.30:0:0.67:0:0:0:0:0:0:0:0:0	0	0	1640	0	0	1.73	0	0	0	0	0	0	0	0	1480	0	287	0	621	1080	346	1870	0	2370	0	4150	410	1600	1080	5910	1010	904	1860	0	483
QSNVAAPGDATPPA	648.313	0.21	2.86	7.3	3.8			502.294	1402.78	0.358071	0.00371519	1.00:1.03:2.05:0.84:1.16:0:0.24:0.92:2.22:0:2.03:1.10:0.68:0.27:0.48:0.84:0.97:0.59:0.64:0:0.99:0:1.14:0:0:0:0:0:0:0:0:0.74:0.79:0.74:0.52:0.67:0.92:0.42:0.58:1.00:1.11:1.80:1.06:0.48:0.24:0.60	1540	1580	3160	1290	1790	0	370	1410	3420	0	3120	1690	1040	414	735	1290	1500	901	979	0	1520	0	1760	0	0	0	0	0	0	0	0	1130	1210	1140	800
RGAASKVKVPM	1143.66	0.04	60	8.2	11.17			482.176	41.3333	11.6656	0.00320829	0:0:0.87:0:0:0:0:0:0:1.00:0:0:0:0:0:0:0:0:0:0.28:0:2.82:4.05:0:1.75:4.29:2.17:1.72:1.48:0.46:0:0:1.58:0:0:0:0:0:0:1.96:0:0:0:0.29:0:0	0	0	347	0	0	0	0	0	0	397	0	0	0	0	0	0	0	0	0	113	0	1120	1610	0	696	1710	861	683	590	184	0	0	630	0	0
N(+.98)DNEEGFFSA	565.716	0.2	60	4.3	3.57	sp|P02675|FIBB_HUMAN	Deamidation (NQ)	750	3137.78	0.239023	0.00309736	1.00:0.82:1.55:1.23:0:1.09:2.32:0:1.03:0:0.86:1.63:2.50:0:0:0:1.86:0.90:1.49:0:0:0.72:0:0:0:0:0:0.46:0:0.71:0.41:0:0:0:0:0:0:0:0:0:0:0:0:0:0:0	3370	2750	5220	4140	0	3670	7800	0	3450	0	2890	5490	8410	0	0	0	6260	3030	5030	0	0	2430	0	0	0	0	0	1540	0	2380	1370	0	0	0	0
PFLRSSKIIQISSGRELRV	1093.67	0.08	5.75	8.3	11.71			552.371	6111.67	0.0903797	0.00304709	1.00:1.01:0:0:1.14:1.41:0.27:0:1.39:0:4.49:2.12:0.68:0:0.39:2.46:4.73:1.10:0.21:0.24:0:0:0.16:0:0.76:0:0.01:0:0.07:0.11:0:0:0:0:0.33:0.35:1.01:0:0:0.25:0:1.95:0.72:0.14:0:1.35	4960	4990	0	0	5660	7010	1320	0	6890	0	22300	10500	3350	0	1960	12200	23400	5470	1030	1210	0	0	780	0	3760	0	57.3	0	358	535	0	0	0	0	1660
KIGGDLPKGR	1040.63	0.23	3.89	6.4	9.99			3082.24	1238.44	2.4888	0.00296272	1.16:0.22:0.43:0.29:0.21:0.57:0.14:0.10:0:1.00:0:0.60:1.00:0.46:0.74:1.75:0.81:0.72:2.77:0.97:3.81:2.37:0.91:0.25:1.52:0.20:2.64:0.65:0.10:1.28:0.70:1.05:1.52:1.55:1.70:0.54:1.09:0:1.04:0.37:1.03:0:0.37:0.62:0.30:0	2550	476	942	628	456	1250	308	222	0	2180	0	1320	2180	1010	1610	3810	1770	1580	6040	2110	8310	5180	1990	548	3330	442	5770	1420	218	2800	1530	2290	3320	3380	3720
PPPVLAK	361.243	0.21	60	4	9.18			31.4118	2398.33	0.0130973	0.00262864	0:0:1.50:0:0.94:1.69:1.50:0.86:0.81:1.00:0:1.95:0:0:0:0:0:0:0:0:0:0:0:0:0:0:0:0.13:0:0:0:0:0:0:0:2.97:3.58:0.57:1.80:2.72:1.47:0.69:2.75:1.50:0.34:0	0	0	6320	0	3960	7120	6300	3630	3430	4210	0	8200	0	0	0	0	0	0	0	0	0	0	0	0	0	0	0	534	0	0	0	0	0	0	0
PGGGYGAA	649.289	0.01	60	7.5	5.95			498.941	0	#DIV/0!	0.00257053	0:0:0:0:0:0:0:0:0:0:0:0:0:0:0:0:0:0:0:0:0:0:1.00:0:0:0:0.65:0:0.64:0:0.24:1.09:0.82:1.81:1.17:0:0:0.67:0:0:0:0:0:0:0:0	0	0	0	0	0	0	0	0	0	0	0	0	0	0	0	0	0	0	0	0	0	0	1140	0	0	0	744	0	731	0	271	1250	936	2070	1340
PMGPCLRRHHGPDVPV	884.444	0.31	5.4	6.9	8.68			636.882	2117.94	0.300708	0.00254036	7.43:3.66:0:3.31:7.04:1.49:7.40:7.36:13.88:1.00:6.37:7.61:1.77:3.18:0:3.99:3.36:0.82:1.31:0:3.31:2.09:3.04:0:0:0:2.64:0.67:0:0:0:2.91:1.91:0:4.72:5.59:2.28:2.43:4.09:3.31:0:5.48:1.98:0:0:0.65	3560	1750	0	1580	3370	712	3540	3520	6640	479	3050	3640	849	1520	0	1910	1610	393	628	0	1580	1000	1460	0	0	0	1260	323	0	0	0	1400	916	0	2260
TSAGLKLILK	522.35	0.04	60	4.1	10			475.471	0	#DIV/0!	0.00248438	0:0:0:0:0:0:0:0:0:0:0:0:0:0:0:0:0:0:1.00:0:0.71:0:0.99:0:0:0:0:0.65:0.57:0.80:0:0:0.47:0:0:0:0:0:0:0:0:0:0:0:0:0	0	0	0	0	0	0	0	0	0	0	0	0	0	0	0	0	0	0	1560	0	1110	0	1540	0	0	0	0	1010	887	1240	0	0	736	0	0
IPLDLLLAVPVP	630.395	0.07	60	4	3.8			2336.47	270.556	8.63583	0.0022587	0:0:0:0:0:0:0:0:0:0:0:0:0:0:0:1.00:0:0:1.16:0:1.07:0:0:0:0:0:0.68:0.65:1.08:0:0.80:0:0.92:1.06:0.72:0:0:0:0:0:0:0:0:0:0:0	0	0	0	0	0	0	0	0	0	0	0	0	0	0	0	4870	0	0	5670	0	5230	0	0	0	0	0	3290	3160	5280	0	3920	0	4490	5160	3520
E(-18.01)RSLRPYSLVRPLLV	890.533	0.12	4.52	8.1	10.74		Pyro-glu from E	2977.94	778.278	3.82632	0.00211209	1.00:0.47:0:0.65:0:1.15:0:0.73:0:0:1.15:0:0.93:0:3.28:0.24:0:2.53:0:5.44:4.44:0:2.93:2.52:0:4.31:2.26:1.61:4.64:0.25:6.57:0:3.16:5.23:0.53:0.52:1.14:0:0:1.48:0:0.87:2.88:1.96:0.35:2.36	1150	547	0	753	0	1330	0	843	0	0	1330	0	1070	0	3790	276	0	2920	0	6270	5120	0	3370	2910	0	4970	2610	1860	5350	292	7580	0	3650	6030	613
LLVLITGGK	457.32	0.06	60	5.1	8.75			2128.82	102.222	20.8254	0.00197869	0:0:0:0:1.00:0:0:0:0:0:0:0:0:0:0:0:0:0:0:0:0:0:2.54:3.25:3.34:0:3.00:0:0:1.72:2.86:0:1.41:0:1.50:0:0:0:0:0:0:0:0:0:0:0	0	0	0	0	1840	0	0	0	0	0	0	0	0	0	0	0	0	0	0	0	0	0	4680	6000	6150	0	5540	0	0	3180	5280	0	2600	0	2760
KVMRLRKLAQ(+.98)QIAN	835.506	0.01	60	7.7	12.02		Deamidation (NQ)	9186.47	699.444	13.134	0.00171131	0:0:0:0:0:0:0:0:0:0:0:1.00:0:0:0:0:0:2.09:0:2.30:0:0:0:1.67:7.08:6.40:1.38:0:2.18:5.18:5.97:2.17:3.98:0:0:0:0:0:0:0:1.70:0:0:0:0:0	0	0	0	0	0	0	0	0	0	0	0	4080	0	0	0	0	0	8510	0	9390	0	0	0	6820	28800	26100	5630	0	8890	21100	24400	8840	16200	0	0
FLPLVAMVLLV	1214.74	0.04	60	9.2	5.52			1294.94	100.5	12.885	0.00162471	0:0:0:0:0:1.00:0.92:0:0:0:0:0:0:0:0:0:0:0:6.29:0.65:2.44:2.09:1.29:2.73:1.77:1.04:0.57:1.31:0.84:0:0:0:0.61:1.71:0:0:0:0:0:0:0:0:0:0:0:0	0	0	0	0	0	943	866	0	0	0	0	0	0	0	0	0	0	0	5930	614	2300	1970	1210	2580	1670	985	536	1240	789	0	0	0	580	1610	0
DNEEGFF	857.329	0.29	60	3.4	3.57	sp|P02675|FIBB_HUMAN		3286.47	28938.9	0.113566	0.00122918	1.00:1.15:0.31:0.20:0.24:0:0:0.77:1.11:0:0.65:0.37:0.11:0:0:0.05:0.71:0.83:0.05:0:0:0:0:0:0:0:0:0:0:0:0:0.25:0:0.21:0.29:0:0:0:0:0:0:0:0:0:0:0	69500	79700	21700	13700	17000	0	0	53800	77200	0	45500	25600	7340	0	0	3160	49300	57400	3370	0	0	0	0	0	0	0	0	0	0	0	0	17600	0	14700	20200
RSMEK	650.329	0.28	3.49	6	8.75			4313.53	1613.33	2.67368	0.000900634	1.00:0:1.02:0:1.12:0:0:1.35:1.24:0:0:0:1.43:0:0:0.91:1.66:1.12:3.67:0.84:2.26:1.85:1.75:2.24:1.18:0:1.20:1.01:1.46:1.51:0:0.77:2.77:2.44:2.41:0.76:1.12:0.64:1.21:1.40:1.52:2.59:2.90:0:0:0	2680	0	2730	0	3000	0	0	3600	3320	0	0	0	3820	0	0	2440	4450	3000	9820	2260	6060	4970	4680	5990	3170	0	3200	2710	3910	4050	0	2070	7430	6550	6460
VFPVVIQAVVD	1185.71	0.11	6.81	6.7	3.8	sp|O60291|MGRN1_HUMAN		1451.71	358.444	4.05002	0.000798664	0:0:1.00:0.35:0.12:0.21:0.46:0:0:0:0:0.22:0:0:0.09:0.11:0:0:1.40:0.50:0.15:0.55:0.33:1.01:1.17:1.06:0.46:0.20:0:1.14:0.13:0.69:0.19:0.35:0.52:0.96:0:0:0:0.24:0:0:0:0:0:0	0	0	2510	887	313	538	1160	0	0	0	0	550	0	0	225	269	0	0	3510	1250	372	1380	822	2530	2930	2650	1160	503	0	2860	314	1730	478	890	1300
KKKMKSKKK	567.38	0.1	60	8.5	10.78			2811.18	353.333	7.95616	0.000766833	0:0:0:0:1.00:0:0:0:0:0:0:0:0:2.26:0.67:0:0:0:2.20:0:1.23:0:2.54:0.82:0:4.54:0:1.76:0:2.66:4.16:2.88:2.52:0:4.20:0:0:0:0:0:0:0:0:0:0:0	0	0	0	0	1620	0	0	0	0	0	0	0	0	3650	1090	0	0	0	3560	0	1980	0	4120	1320	0	7360	0	2850	0	4310	6740	4670	4080	0	6800
VLLHRGATP	482.285	0.06	60	5.3	9.73			0	566.944	0	0.000609472	0.46:0.52:0:0:0.39:0.82:0:1.08:1.25:1.00:1.44:1.43:0:1.64:0:0:0:0:0:0:0:0:0:0:0:0:0:0:0:0:0:0:0:0:0:0.40:1.05:0:1.11:0.28:0:0:0:0.50:0.31:0	468	531	0	0	402	834	0	1100	1270	1020	1460	1450	0	1670	0	0	0	0	0	0	0	0	0	0	0	0	0	0	0	0	0	0	0	0	0
GVRVGALLLLGVL	640.428	0.22	60	7.2	9.75			3064.82	891.111	3.43933	0.000543519	0:0:0:1.00:0:0.77:1.55:0:0:0:0:0:0:1.01:0.71:1.64:0:0:1.19:2.12:0:0:0:1.59:1.70:0.29:1.83:1.20:1.74:1.40:1.01:1.36:1.43:2.02:2.79:0:0:0:0:0:0:0:0:0:0:0	0	0	0	2410	0	1840	3720	0	0	0	0	0	0	2420	1710	3940	0	0	2860	5100	0	0	0	3820	4080	702	4410	2880	4190	3360	2420	3280	3430	4850	6720
MVLKIIAFKPK	644.409	0.12	60	4.2	10.3			1887.41	318.222	5.93111	0.000233599	0:0:0:0:1.00:0.90:0:0:0:0:0:0:0:0:1.33:2.48:2.47:0:2.48:4.24:2.27:3.23:0:6.64:0:0:1.30:1.79:3.67:2.44:0:5.46:1.82:4.95:5.58:0:0:0:0:0:0:0:0:0:0:0	0	0	0	0	699	631	0	0	0	0	0	0	0	0	928	1740	1730	0	1730	2970	1590	2260	0	4640	0	0	906	1250	2570	1710	0	3820	1280	3460	3900
NPGGDFGKKELSP	673.34	0.16	60	5.5	6.07			2638.82	9326.11	0.28295	0.000196886	1.00:1.03:1.38:0.85:0:1.29:0.62:0.78:2.87:0:1.95:2.32:1.70:1.17:1.08:1.92:1.87:1.80:0.87:0:0:1.14:0:0:1.48:0:0:0.51:0.33:0:0:0:0.38:0:1.61:0:0:0:0:0:0:0:0:0:0:0	7100	7320	9820	6060	0	9140	4400	5560	20400	0	13800	16500	12100	8320	7650	13600	13300	12800	6210	0	0	8080	0	0	10500	0	0	3630	2320	0	0	0	2720	0	11400
NDN(+.98)EEGFFSA	565.717	0.15	60	8.3	3.57	sp|P02675|FIBB_HUMAN	Deamidation (NQ)	2907.06	11348.3	0.256166	0.000146939	1.00:2.25:2.83:1.30:1.37:1.23:1.96:1.21:2.37:0:3.17:3.49:2.95:0:0:1.09:2.89:2.30:1.72:0.25:0:0.75:0:0:1.22:0:0:1.20:0:1.27:0.20:0.76:0.23:0:0:0:0:0:0:0:0:0:0:0:0:0	6500	14700	18400	8460	8910	8000	12700	7890	15400	0	20600	22700	19200	0	0	7110	18800	14900	11200	1600	0	4880	0	0	7950	0	0	7790	0	8260	1280	4940	1520	0	0
KKESKKKTLKN	666.42	0.07	60	7.1	10.3			928.412	214.389	4.3305	4.37353e-05	0:0:0:0:1.00:1.07:0:0:0:0:0:0:0:1.52:2.37:0:0.34:0:2.08:2.48:1.59:1.15:1.31:1.02:0:1.89:2.03:0.62:2.11:1.70:1.19:0:1.72:2.31:2.57:0:0:0:0:0:0:0:0:0:0.33:0	0	0	0	0	613	657	0	0	0	0	0	0	0	930	1450	0	209	0	1270	1520	975	706	804	627	0	1160	1240	380	1290	1040	731	0	1050	1420	1570
QVLKIIATFK	580.88	0.26	60	8.7	10			7456.47	2041.11	3.65314	1.82365e-05	1.00:5.51:0:3.97:13.91:0:19.58:0:0:0:0.42:2.14:0:17.04:19.47:14.49:5.46:0:24.99:41.90:18.02:6.97:27.24:26.83:23.09:31.55:32.15:0:10.96:11.34:25.44:14.55:19.67:15.92:24.68:0:0:0:0:0:0:0:0:0:0:0	357	1970	0	1420	4960	0	6980	0	0	0	151	762	0	6080	6940	5170	1950	0	8910	14900	6430	2480	9710	9570	8240	11300	11500	0	3910	4050	9070	5190	7020	5680	8800
DSGGQEAN(+.98)N(+.98)PN(+.98)CCNCI	547.853	0.17	60	6.8	3.67		Deamidation (NQ)	7084.71	709.333	9.98784	1.96795e-06	0:0:1.00:0.11:0.61:0:0:0:0:0:0:0.08:0:0.18:0:0:0:0:1.52:0.94:1.18:0.81:0:0:1.27:2.13:0.84:0.62:1.48:1.10:2.10:1.38:1.33:1.89:0:0:0:0:0:0:0:0:0:0:0:0	0	0	6470	686	3930	0	0	0	0	0	0	502	0	1180	0	0	0	0	9840	6060	7660	5240	0	0	8250	13800	5420	4000	9580	7140	13600	8930	8620	12300	0
